# Supplementary material for: N-Glycomic Profiling of Microsatellite Unstable Colorectal Cancer
Source: Preprints.org preprint supplement (doi:10.20944/preprints202306.0975.v1), 2023-06-14
Supplement: Supplementary file 1 [file supplementary]

## Sheet: Neutral-Peak table
Supplementary Table S2. MS data of neutral N-glycans.
Neutral N-glycans			AH33-31-11-1	AH34-1-11-1	AH34-6-11-1	AH34-14-11-1	AH33-31-1-1	AH33-31-2-1	AH33-31-3-1	AH33-31-4-1	AH33-31-5-1	AH33-31-6-1	AH33-31-7-1	AH33-31-8-1	AH33-31-9-1	AH33-31-10-1	AH34-1-1-1	AH34-1-2-1	AH34-1-3-1	AH34-1-4-1	AH34-1-5-1	AH34-1-6-1	AH34-1-7-1	AH34-1-8-1	AH34-1-9-1	AH34-1-10-1	AH34-6-1-1	AH34-6-2-1	AH34-6-3-1	AH34-6-4-1	AH34-6-5-1	AH34-6-6-1	AH34-6-7-1	AH34-6-8-1	AH34-6-9-1	AH34-6-10-1	AH34-14-1-1	AH34-14-2-1	AH34-14-3-1	AH34-14-4-1	AH34-14-5-1	AH34-14-6-1	AH34-14-7-1	AH34-14-8-1	AH34-14-9-1	AH34-14-10-1
			Normal colon				MSI CRC Stage IV BRAFwt										MSI CRC Stage II BRAFwt										MSI CRC Stage IV BRAFmut										MSI CRC Stage II BRAFmut										AVERAGES
			A	B	C	D	500	501	502	503	504	505	506	507	508	509	600	601	602	603	604	605	606	607	608	609	700	701	702	703	704	705	706	707	708	709	800	801	802	803	804	805	806	807	808	809	Normal	MSI CRC	MSI CRC St II
Composition	Short	m\z	%	%	%	%	%	%	%	%	%	%	%	%	%	%	%	%	%	%	%	%	%	%	%	%	%	%	%	%	%	%	%	%	%	%	%	%	%	%	%	%	%	%	%	%	%	%	%
HexHexNAc2	H1N2	609.21	0.103546	0	0.15665	0	0.270041	0.195019	0.26589	0.188931	0	0.314707	0.515304	0.1365	0.386193	0.292101	0.111668	0.173282	0.209319	0	0.232537	0.4518	0.203499	0.435022	0.285129	0	0.382216	0.203173	0.235037	0.246855	0.273684	0.410491	0.279771	0.110235	0.198636	0.309702	0.417388	0.389058	0.35593	0	0.19994	0.281013	0.435253	0.260768	0.123907	0.173835	0.0650491	0.248846	0.236967
HexHexNAc2dHex	H1N2F1	755.27	0.171778	0.0795759	0.194273	0	1.26298	0.891116	0.810478	1.16574	0.246914	1.91692	2.32111	0.5354	1.84757	1.2863	0.239949	0.463138	0.337554	0.267401	0.581711	1.4866	0.849004	1.05953	1.35517	0.279735	1.12078	0.30032	0.420806	0.764235	0.683409	2.4946	0.611804	0.105326	0.790985	0.687381	1.03478	0.556695	0.969366	1.10233	0.59388	0.835639	2.02276	0.40686	0.635197	0.458092	0.111407	0.894989	0.776769
Hex2HexNAc2	H2N2	771.26	3.55579	2.14948	2.22217	2.37079	1.44589	1.55071	2.37728	2.16408	2.20175	1.96415	3.01561	1.53559	2.49041	2.738	2.90044	2.8287	4.1012	0.954575	2.7228	2.93532	1.92821	2.8457	1.92126	1.26837	2.24697	3.29803	2.12863	4.61846	1.92233	3.12937	3.62701	0.988928	1.77607	2.31512	2.20865	2.89903	3.19661	3.31176	3.0012	1.48976	4.24457	1.76687	1.97119	3.40483	2.57456	2.48589	2.59505
Hex2HexNAc2dHex	H2N2F1	917.32	4.02101	2.75667	4.04804	2.89858	10.928	11.001	12.6916	12.7633	6.33112	12.4645	20.2859	8.44994	17.8135	17.0864	2.8379	10.9624	7.41864	3.71779	9.07808	28.2303	11.3705	14.2307	18.358	7.42975	9.52936	12.01	9.15009	9.79999	8.85954	23.0335	6.07327	2.07128	7.24029	9.30323	11.9369	11.5874	12.8764	18.7599	12.0505	7.41903	22.1456	7.81736	10.6257	11.1419	3.43108	11.672	11.9997
Hex3HexNAc2	H3N2	933.31	4.49104	3.16998	3.15518	3.38293	1.54826	1.47873	2.06451	3.7914	2.45987	2.30814	2.26953	1.57847	2.09719	2.69678	5.95019	3.12975	4.71743	1.79472	1.19636	2.39574	1.38744	1.99801	1.75575	1.81773	2.56964	3.4996	2.88563	5.52067	1.93675	2.37808	5.93056	1.72946	1.4404	2.5084	1.97482	3.15895	3.15462	2.88369	2.78503	1.43816	3.43525	2.49208	2.32582	2.98389	3.54978	2.63669	2.63877
Hex3HexNAc2dHex	H3N2F1	1079.38	5.34972	4.18493	3.90186	3.82809	5.38653	2.83827	4.87516	7.91248	5.61395	5.592	4.96729	3.95325	4.58919	6.69471	1.09684	6.50601	3.22498	3.58764	3.86418	4.92915	2.84434	6.05355	5.6182	6.79459	5.77264	8.08531	8.18909	3.6046	2.84999	5.41788	2.12929	1.16047	2.98165	4.32255	4.10686	5.08063	4.97844	5.64387	6.95961	2.72698	6.7804	6.66528	6.62317	6.83159	4.31615	4.94631	5.04582
Hex4HexNAc2	H4N2	1095.37	1.45875	1.04723	1.40718	1.40792	0.91091	0.59195	0.895331	1.39829	1.16461	1.30158	0.858824	0.679568	1.26707	1.39761	1.44706	1.37385	1.4774	0.540223	0.406986	0.935014	0.610569	1.07907	0.857242	0.611742	1.09713	1.49933	1.06975	1.57605	1.02474	1.07325	1.48875	0.641478	0.809544	1.26054	0.733983	1.09353	1.05773	1.29056	1.21037	0.862516	1.33998	1.27374	0.865676	1.36899	1.33027	1.06106	1.02181
Hex2HexNAc3dHex	H2N3F1	1120.4	0.110426	0.0785035	0.0979282	0.071037	0.227452	0.241004	0.13805	0.259851	0.176403	0.556042	0.309473	0.0971014	0.254476	0.297815	0.0912346	0.0930869	0.069373	0.143939	0.136256	0.182938	0.155308	0.131049	0.218831	0.140001	0.187623	0.107895	0.129763	0.154134	0.236687	0.256398	0.103585	0.0762372	0.116646	0.152137	0.65114	0.161002	0.32274	0.249131	0.190701	0.261047	0.23222	0.155218	0.143309	0.192272	0.0894737	0.199989	0.19604
Hex3HexNAc3	H3N3	1136.4	0.640407	0.340684	0.913707	0.491764	0.658845	0.464319	0.366345	1.28097	0.541114	0.876143	0.35924	0.522618	0.483005	0.870618	0.852961	0.301302	0.812937	0.567927	0.413175	0.510008	0.431931	0.354475	0.395472	0.742612	0.572143	0.398621	0.374462	1.35582	0.728454	0.539241	1.75189	0.772268	0.483514	0.429163	0.790387	0.803702	0.359409	0.430005	0.393962	0.645413	0.399761	0.517909	0.300555	0.832041	0.59664	0.617118	0.542797
Hex4HexNAc2dHex	H4N2F1	1241.43	0.168635	0.11058	0.142426	0.134395	0.150147	0.201021	0.165398	0.295057	0.157685	0.21261	0.181477	0.185879	0.197509	0.298529	0	0.223832	0.12831	0	0.151156	0.246689	0.105461	0.332548	0.208631	0.21837	0.192724	0.200906	0.176162	0.0990723	0.178786	0.25064	0.113537	0.0435971	0.142084	0.212208	0.164498	0.178477	0.256361	0.220691	0.223479	0.12815	0.190499	0.227386	0.227397	0.208493	0.139009	0.182386	0.182021
Hex5HexNAc2	H5N2	1257.42	9.25659	9.13165	9.4924	11.4723	8.29887	7.42324	8.91109	10.584	9.82633	9.78488	6.64853	7.30408	10.931	10.2641	11.2645	8.62619	11.459	7.27826	5.92806	7.93099	7.14772	11.699	9.15844	4.81176	7.48899	8.6887	7.5883	9.10551	9.43664	7.61489	11.813	7.48015	8.22511	7.63425	6.78414	10.2542	8.10019	6.9781	8.94955	7.90182	6.00003	11.9943	6.87495	9.77997	9.83823	8.59932	8.44606
Hex3HexNAc3dHex	H3N3F1	1282.45	0.942041	0.748324	1.09345	0.986033	2.67554	1.35785	1.25342	2.30996	2.35605	3.65547	1.75709	2.77366	1.67755	2.52942	0.350179	1.18853	0.885051	1.60482	1.03037	1.45092	1.51329	1.15973	2.02789	2.08074	2.2751	1.67	1.45383	2.24077	1.59992	1.88313	0.870342	0.551485	1.83001	1.52714	2.05927	2.36299	1.73158	1.89932	1.47018	2.26014	2.14588	1.99739	1.85571	2.16325	0.942463	1.78713	1.66186
Hex4HexNAc3	H4N3	1298.45	0.59334	0.401299	0.590395	0.666405	0.731417	0.437772	0.388014	0.944673	0.530876	0.649016	0.49116	0.498406	0.546692	0.703601	1.21527	0.337648	0.607822	0.502883	0.450679	0.479518	0.277303	0.539042	0.43998	0.825547	0.696917	0.448259	0.61786	1.37465	0.716133	0.649924	1.84643	0.542409	0.474934	0.433034	0.950504	0.486283	0.312773	0.605638	0.42138	0.689113	0.48918	0.459841	0.424257	0.530576	0.56286	0.619185	0.552262
Hex3HexNAc4	H3N4	1339.48	0.733932	0.536205	1.47275	0.584935	0.463634	0.641726	0.438161	0.701119	0.439228	1.31559	0.374442	0.58891	0.366415	0.746599	0.947819	0.240251	0.83086	0.551064	0.296724	0.359408	0.383434	0.228596	0.383417	0.454241	0.462297	0.322296	0.370707	1.16151	0.848656	0.391868	1.20072	1.41545	0.794676	0.43431	0.583446	0.475671	0.242628	0.307377	0.503478	0.504067	0.268153	0.438278	0.346051	0.396397	0.831956	0.555492	0.437068
Hex5HexNAc2dHex	H5N2F1	1403.48	0.20544	0.162157	0.233549	0.145241	0.186015	0.192873	0.271576	0.301579	0.22129	0.274541	0.208965	0.230214	0.171896	0.318215	0	0.221065	0.118925	0.134905	0.211704	0.155691	0.178151	0.24978	0.163198	0.195544	0.298611	0.296252	0.2139	0.124946	0.115111	0.346085	0.0902864	0.0638987	0.140681	0.275078	0.118484	0.15665	0.263299	0.236227	0.263477	0.102967	0.177948	0.293888	0.241107	0.237048	0.186597	0.201552	0.186003
Hex6HexNAc2	H6N2	1419.48	11.1232	10.1602	10.4961	13.4227	8.10524	6.74986	10.6205	9.86159	8.19641	7.22452	8.52497	9.23274	7.73113	8.61023	6.86351	11.3564	10.8136	4.27601	9.4319	10.821	8.78418	7.78261	7.17923	4.05165	10.6617	9.3315	9.36409	6.54233	8.41232	9.29848	9.92548	6.18631	6.33764	10.4608	5.57807	11.8026	20.9066	8.63535	10.5183	6.11489	10.5312	9.92343	9.52124	7.9549	11.3005	8.85561	9.14233
Hex4HexNAc3dHex	H4N3F1	1444.51	0.604874	0.4644	0.61657	0.628672	2.38257	0.689517	0.721854	1.50637	1.23714	1.37516	0.818378	1.16014	1.61479	1.58768	0.27721	0.853661	0.407691	0.996131	0.907062	0.702185	0.656551	1.60885	1.2147	1.08653	0.988165	0.970749	1.0215	1.67466	1.42265	1.62206	0.680344	0.257061	1.04137	0.87278	1.25694	1.10574	0.466805	0.995684	0.710135	1.15017	1.35965	0.631916	0.931469	1.26983	0.578629	1.05585	0.929445
Hex5HexNAc3	H5N3	1460.5	0.369243	0.386068	0.549806	0.462042	0.329557	0.293295	0.368135	0.393444	0.369273	0.332973	0.214539	0.337156	0.261268	0.313067	0.365356	0.268274	0.255343	0.39508	0.363552	0.240221	0.19931	0.21538	0.211413	0.304349	0.437518	0.381913	0.366451	0.41188	0.504136	0.30259	0.771105	0.26476	0.429588	0.331745	0.403385	0.274941	0.280952	0.395982	0.353249	0.465368	0.230124	0.224067	0.23602	0.46931	0.44179	0.339152	0.307584
Hex3HexNAc4dHex	H3N4F1	1485.53	5.69625	5.5355	7.40227	5.23915	4.11441	14.5749	5.53471	3.24422	7.82348	9.19528	10.0782	10.3814	2.58989	4.78875	1.41667	4.19611	3.8859	21.4499	4.19917	1.83122	10.4088	2.13274	5.72762	9.57406	3.60857	6.92488	3.93987	7.70923	6.1143	2.15799	6.29447	7.28693	7.82945	5.02149	6.55165	6.12749	2.741	6.54857	7.12392	6.73641	3.00219	9.64055	12.6413	5.68257	5.96829	6.52076	6.58089
Hex4HexNAc4	H4N4	1501.53	0.643507	0.569154	1.04504	0.798522	1.24944	0.735917	0.681542	1.18332	0.497727	1.388	0.292678	0.586111	0.881819	0.942287	1.14342	0.229371	0.838383	1.10333	0.236608	1.06159	0.446966	0.298666	0.650929	0.840004	0.857605	0.467165	1.07025	1.14239	1.50293	0.632054	1.48379	1.58242	1.05241	0.571623	1.16917	0.443642	0.20531	0.568671	0.499783	0.718502	0.363321	0.638047	0.567042	0.542689	0.764057	0.784174	0.628273
Hex3HexNAc5	H3N5	1542.56	1.04062	0.797313	1.92614	1.00688	0.174069	0.554682	0.227245	0.26386	0.33393	0.490954	0.335928	0.785413	0.132461	0.286771	0.740435	0.194712	1.15767	0.364365	0.257874	0	0.201357	0.177852	0.248039	0.299023	0.122235	0.233168	0.33363	0.885142	0.193986	0.241329	0.769179	3.70267	0.842523	0.475826	0.287235	0.215484	0.21516	0.337296	0.242171	0.278379	0.16776	0.223066	0.229102	0.25351	1.19274	0.436887	0.304525
Hex7HexNAc2	H7N2	1581.53	5.05888	4.43915	4.43182	5.61383	4.12817	3.39574	6.84008	4.42924	4.74352	3.79711	4.46788	4.80766	4.01216	5.51083	5.34612	7.26997	6.93807	2.25183	6.10277	5.86509	4.46119	3.93753	3.89584	2.97121	8.26279	6.12061	5.42884	3.56304	4.04514	3.96733	5.16082	4.40995	3.493	5.37875	2.49535	5.31394	7.3514	5.13556	5.91834	3.66314	5.44181	7.14074	6.3559	4.94311	4.88592	4.96904	5.13995
Hex4HexNAc3dHex2	H4N3F2	1590.57	0.123646	0.118431	0.102983	0.149167	0.41331	0.247348	0.25065	0.615723	0.559151	0.902179	0.190787	0.732827	0.179824	0.34647	0	0.219826	0.176793	0	0.246613	0.174622	0.275973	1.05775	0.518332	0.290653	0.147152	0.280543	0.498178	0.178171	0.694998	0.268706	0.164797	0	0.537648	0.268171	0.180419	0.485799	0.295273	0.172954	0.318716	0.273988	0.220598	0.58326	0.118088	0.187005	0.123557	0.331832	0.289833
Hex5HexNAc3dHex	H5N3F1	1606.56	0.235755	0.203602	0.22362	0.217223	0.181074	0.187942	0.171384	0.256845	0.444217	0.195962	0.123199	0.363224	0.213946	0.220815	0	0.196404	0.148028	0.20296	0.208598	0	0.173409	0.232687	0.19055	0	0.351232	0.222061	0.270418	0.179043	0.277091	0.22513	0.148005	0.116993	0.392735	0.191075	0.18657	0.288684	0.162191	0.233323	0.203032	0.268155	0.178808	0.213176	0.133371	0.205386	0.22005	0.203943	0.171267
Hex6HexNAc3	H6N3	1622.56	0.420257	0.443263	0.564785	0.517044	0.460941	0.401015	0.501621	0.341538	0.443616	0.34813	0.243556	0.335996	0.361846	0.316265	0.611257	0.400427	0.305349	0.457714	0.55072	0.174622	0.223409	0.328295	0.344473	0.398697	0.564197	0.425765	0.324785	0.448168	0.553422	0.368591	0.799987	0.421373	0.423146	0.313513	0.480583	0.29607	0.167092	0.335095	0.3052	0.399238	0.193115	0.377039	0.329837	0.443033	0.486337	0.387969	0.356063
Hex4HexNAc4dHex	H4N4F1	1647.59	4.04226	5.55477	5.22416	4.40166	6.52635	5.64795	4.55562	3.14897	4.39192	5.61083	4.739	5.40791	4.20266	3.86863	1.61666	2.68649	2.62357	7.86124	2.8535	2.44102	9.6861	2.41902	4.27369	4.83306	2.44134	3.27097	3.29415	4.42938	6.74409	3.06228	3.8411	3.03626	5.24675	3.5187	4.84059	3.15632	1.47896	3.05347	4.78867	6.17111	1.89956	4.61568	5.76101	3.79443	4.80571	4.19598	4.04271
Hex5HexNAc4	H5N4	1663.58	1.68558	1.71119	1.89662	1.57756	4.2639	2.66492	1.75649	3.68088	1.6053	2.13082	1.5718	1.79913	2.4737	2.10441	6.83126	1.46407	1.70774	5.64374	5.60987	3.84539	1.30474	2.03189	2.24672	8.90982	3.76884	1.84537	3.72141	5.33885	3.49525	2.69187	5.11471	3.53295	2.82978	1.94598	7.19545	0.890737	0.90015	2.4832	1.27285	5.83835	1.34832	2.04878	1.51007	3.36548	1.71774	3.11963	3.32243
Hex3HexNAc5dHex	H3N5F1	1688.61	4.44094	3.94647	4.72943	3.95051	0.944857	4.18985	1.42307	0.795784	2.91836	2.31794	1.18716	3.77087	0.669072	1.27999	0.317885	0.920154	0.603175	1.49781	0.754478	0.356636	1.33952	0.636029	1.57493	2.28947	1.1152	1.60275	2.26378	1.16233	1.13057	1.0111	1.10605	1.17672	5.72388	2.98232	1.48195	1.17486	0.738183	2.31586	1.71961	0.959836	1.70171	1.70363	2.74718	1.80947	4.26684	1.63535	1.33212
Hex4HexNAc5	H4N5	1704.61	0.402645	0.367106	0.604566	0.380376	0.258356	0.391825	0.26207	0.185559	0.27275	0.279936	0.170301	0.240953	0.258511	0.171281	3.18273	0.194398	1.44089	0.336059	0.274362	0.179242	0.151723	0.197593	0.179423	0.34011	0.172002	0.269314	0.272944	0.646506	0.254193	0.154145	0.918549	7.69953	0.662485	0.215342	0.216325	0.165065	0.0981873	0.313729	0.250197	0.246513	0.164997	0.240581	0.18286	0.259927	0.438673	0.559287	0.430746
Hex8HexNAc2	H8N2	1743.58	6.7065	6.4845	5.9691	8.70835	4.60719	3.92949	7.53555	5.25993	5.27244	4.41131	6.05635	6.63073	4.42961	4.86267	4.86905	8.51561	9.90217	1.70739	6.4902	6.39173	5.48391	4.93304	4.54723	2.58773	11.3582	5.25818	5.27302	4.05264	4.49217	4.15225	4.55644	5.07768	4.36068	7.65681	2.29249	6.52528	11.0361	6.40951	7.38918	3.45471	6.56115	7.34155	7.51468	4.02916	6.96712	5.68038	5.89909
Hex6HexNAc3dHex	H6N3F1	1768.61	0.183209	0.170342	0.14853	0.163615	0.10857	0.179272	0.0833706	0.182444	0.296655	0.0930231	0.0798118	0.191273	0.12738	0.104908	0	0.17931	0	0.196335	0	0	0.177437	0.231788	0.163659	0	0.168259	0.124069	0.185222	0.0934377	0.204618	0.114055	0.126188	0.0775506	0.341129	0.105453	0.139129	0.173861	0.0801247	0.135636	0.10839	0.156328	0.058452	0.182829	0.0985782	0.113915	0.166424	0.129561	0.109789
Hex4HexNAc4dHex2	H4N4F2	1793.64	0.233954	0.192816	0.229906	0.238664	0.496492	0.493674	0.256542	0.431517	0.850163	0.428088	0.181275	0.78099	0.157395	0.29335	0	0.281605	0.248262	0.190915	0.350776	0	0.657622	0.578387	0.509523	0.50522	0.151904	0.37544	0.574155	0.0879574	0.337775	0.364772	0.111909	0.0471153	0.454691	0.494069	0.194127	0.570392	0.176248	0.18013	0.284402	0.367881	0.326274	0.342454	0.122511	0.213949	0.223835	0.336749	0.305034
Hex5HexNAc4dHex	H5N4F1	1809.64	6.47451	10.5911	6.67841	7.09713	13.6819	8.41813	8.21798	6.61446	8.23931	5.45351	6.58056	8.52191	9.78538	6.84193	6.3503	6.97101	5.70671	22.6176	18.4346	6.25591	10.0725	7.75683	11.0714	19.6777	9.9035	6.84685	9.56182	10.4697	13.2753	8.5161	8.39252	6.38084	8.93521	6.99939	17.5957	4.82549	3.36892	5.64367	7.0464	20.7984	2.5042	8.36579	7.66175	14.9935	7.71028	9.48387	10.3859
Hex4HexNAc5dHex	H4N5F1	1850.67	2.58076	3.12615	2.48081	2.12661	1.25418	3.09453	1.46834	0.832711	2.41283	1.24687	0.86968	1.31436	1.61615	0.751491	0.62293	1.06276	0.609814	1.24125	1.08555	0.480442	1.30525	0.859698	1.15906	1.12153	0.590144	1.69417	1.78175	1.15509	1.48395	0.837646	0.894118	0.798003	3.88658	1.63166	1.26991	0.783006	0.359363	1.72136	1.02675	1.37106	1.10506	0.898093	1.60752	1.63774	2.57858	1.27356	1.06641
Hex5HexNAc5	H5N5	1866.66	0.337056	0.306181	0.321321	0.243711	0.175717	0.162856	0.119662	0.173585	0.135035	0.185198	0.137477	0.112847	0.215974	0.0897728	9.5296	0.186866	0.917154	0.250538	0.242257	0	0.150303	0.206506	0.173396	0.355328	0.131696	0.200287	0.133878	0.32215	0.178097	0.160783	0.756842	8.18066	0.211974	0.14008	0.245455	0.101551	0.13177	0.150963	0.0931123	0.229851	0.110991	0.113945	0.0880334	0.145471	0.302067	0.633692	0.671155
Hex9HexNAc2	H9N2	1905.63	6.06245	6.87896	5.69082	8.05463	3.32958	2.98477	6.47737	4.18823	4.0508	3.84741	4.62144	6.46015	2.58104	3.35028	3.02516	7.5803	7.98865	1.24546	4.73294	4.00615	5.92997	4.89363	3.05807	1.71729	4.53524	3.46326	3.59604	3.10235	5.61151	4.02464	5.10295	2.96135	3.19017	7.99675	2.17221	4.89675	8.77121	6.05985	6.07869	2.17873	6.47826	4.01834	4.754	2.41986	6.67172	4.43702	4.60028
Hex5HexNAc4dHex2	H5N4F2	1955.7	0.550221	0.663962	0.450139	0.385725	0.651531	0.45947	0.368491	0.478102	1.2526	0.518942	0.245133	0.415148	0.358348	0.568567	0.318274	0.526879	0.289418	0.423386	0.895801	0.334462	0.845055	1.05642	0.939767	0.777612	0.43855	0.536514	0.50951	0.274601	0.754948	0.617896	0.304324	0.0757547	0.694897	0.431623	0.567289	1.53592	0.138481	0.374614	0.274525	1.18992	0.30646	0.26548	0.139652	0.358864	0.512512	0.537831	0.577913
Hex4HexNAc5dHex2	H4N5F2	1996.72	1.02544	1.05003	0.936679	0.643974	0.219992	1.7105	0.629482	0.288342	1.54266	0.118974	0.170817	0.831389	0.265703	0.316976	0	0.371008	0.204451	0	0.446493	0.189405	0.498393	0.562129	0.379708	0.388806	0.1018	0.538903	1.60668	0.0217264	0.435755	0.319702	0.136053	0.0537803	1.66167	1.0443	0.303392	0.391154	0.111014	0.198789	0.243491	0.293308	0.238101	0.241917	0.106451	0.145111	0.91403	0.433208	0.265656
Hex5HexNAc5dHex	H5N5F1	2012.72	2.09005	3.38913	1.85862	1.50807	1.02537	1.36207	0.729985	0.685468	1.76886	0.757652	0.447558	0.53871	2.14036	0.429623	0.611646	0.829879	0.408239	0.8811	1.21273	0.452724	0.66212	0.797124	0.534559	1.2349	0.630376	1.40436	0.933856	1.09792	1.06346	0.75945	0.583843	0.38638	1.46269	0.553577	1.11163	0.597525	0.179981	0.713755	0.507324	1.59516	0.603363	0.491973	0.752726	0.931334	2.21147	0.846784	0.75549
Hex6HexNAc5	H6N5	2028.71	0.164277	0.206711	0.122715	0.106453	0.463157	0.138476	0.162327	0.403979	0.148441	0.207913	0.220292	0.114329	0.193458	0.192247	4.21542	0.322798	0.539229	0.411341	0.467569	0.288265	0.214545	0.173995	0.203531	0.598807	0.293526	0.152671	0.310425	0.48457	0.16477	0.263374	1.12991	1.11186	0.228872	0.217396	0.49906	0.116349	0	0.203919	0.118648	0.447338	0.168422	0.142586	0.13603	0.238231	0.150039	0.402702	0.475304
Hex4HexNAc6dHex	H4N6F1	2053.75	0.0579979	0.133663	0.0880508	0.0561733	0.132659	0.190425	0.123012	0.0781441	0.250326	0.447114	0.0569927	0.206666	0.159907	0.0543692	0	0.213039	0	0	0	0	0.119957	0	0	0	0.0408646	0.152133	0.248782	0	0.0879421	0.184232	0	0.0203051	0.979523	0.193971	0.245871	0.0972177	0	0.321847	0.0686261	0	0.7892	0.0817476	0.156082	0.102062	0.0839712	0.145075	0.109783
Hex10HexNAc2	H10N2	2067.69	0.201019	0.233443	0.199295	0.192329	0.100096	0.0906176	0.186695	0.0892722	0.0911606	0.0901903	0.163328	0.143647	0.0674017	0.085285	0	0.415375	0.230782	0	0.35528	0	0.192074	0	0	0	0.155615	0.116584	0.0872604	0.0784768	0.164924	0.100877	0.142568	0.128954	0.0867303	0.189262	0	0.157858	0.0904131	0.183001	0.172885	0.144897	0.131104	0.084828	0.0992628	0	0.206522	0.115418	0.112888
Hex5HexNAc6	H5N6	2069.74	0.00649947	0.0851164	0.061842	0.0499899	0.0237703	0.0421641	0.00678248	0.0141369	0.0211238	0.0439851	0	0.0186064	0.0959284	0.0265748	1.04548	0.0357312	0.508155	0	0	0	0.0422846	0	0	0.337828	0.0124953	0.0534458	0.0445983	0.0700417	0.016274	0.0672077	0.210275	3.67151	0.176434	0.0464664	0.131124	0.057314	0	0.0251218	0	0	0.0886236	0	0.0133889	0	0.050862	0.173672	0.114253
Hex5HexNAc4dHex3	H5N4F3	2101.76	0.345862	0.295923	0.264211	0.194746	0.351988	0.179071	0.185606	0.277708	0.910875	0.27928	0.140148	0.374006	0.0996712	0.255144	0	0.394615	0.209983	0	0.805714	0	1.17387	1.3095	0.87115	0.604133	0.179614	0.391067	0.623515	0.133968	0.637765	0.419027	0.19699	0.0500662	0.407685	0.236133	0.333911	1.44727	0.186549	0.14353	0.19928	0.992328	0.11129	0.443776	0.0475777	0.332526	0.275185	0.398408	0.48035
Hex4HexNAc5dHex3	H4N5F3	2142.78	0.603361	0.676395	0.610396	0.356344	0.122921	0.38621	0.107227	0.0912506	0.234239	0.0431024	0.112333	0.15389	0.0840569	0.213568	0	0.300356	0.219719	0	0.444804	0	0.446983	0.525179	0.339373	0.368262	0.0294242	0.265805	0.349948	0	0.154583	0.166059	0	0	0.174515	0.768491	0.149522	0.146333	0.0984244	0.0382052	0.202579	0.228323	0.0587822	0.170442	0.0345708	0.101404	0.561624	0.183272	0.193663
Hex5HexNAc5dHex2	H5N5F2	2158.78	1.16725	1.85605	1.08999	0.470254	0.0951154	0.759656	0.304259	0.130443	1.11343	0.0738076	0.07575	0.229742	0.489256	0.0870618	0	0.196	0	0	0.302432	0	0.24014	0.553728	0.178959	0	0.0680945	0.403111	0.427896	0.0518192	0.357165	0.183082	0.122256	0	1.00584	0.154989	0.180512	0.377617	0	0.128594	0.140906	0.332355	0.109085	0.104486	0.0551388	0.137613	1.14588	0.229258	0.151878
Hex6HexNAc5dHex	H6N5F1	2174.77	0.590304	1.03169	0.616379	0.489069	2.55496	0.952889	0.663621	0.84771	0.992529	0.81701	0.640442	0.815943	1.39246	0.781779	0.626427	1.05606	0.611805	1.61224	2.62165	0.89159	1.18773	0.697938	1.27636	2.92175	1.34328	0.700911	1.11788	1.27391	1.20665	1.03422	0.59207	0.480308	0.893728	0.839937	2.33813	0.895746	0.160226	0.654427	0.510812	2.69304	0.567124	0.360178	0.700642	1.16802	0.68186	1.08735	1.17759
Hex6HexNAc6	H6N6	2231.79	0.0716624	0	0.0586046	0.0461481	0	0	0	0.0308549	0	0.0345579	0	0	0.0937418	0.0426425	4.68579	0	0.484576	0	0	0	0	0	0	0	0	0.0439313	0	0.0398438	0	0	0.191949	4.74591	0.0750673	0	0	0.0479652	0	0	0	0	0.0572368	0	0	0	0.0441038	0.264352	0.263778
Hex5HexNAc5dHex3	H5N5F3	2304.84	0.543237	0.806328	0.693601	0.160562	0.056373	0.821685	0.297188	0.141451	0.719535	0.0400026	0.106984	0.323027	0.176181	0.0536585	0	0.145323	0.119263	0	0.342893	0	0.275616	1.31393	0.220685	0	0.0339775	0.269389	1.00316	0	0.24587	0.0907892	0.0678349	0	0.847795	0.226838	0	0.223866	0	0	0.189382	0.248521	0	0.117031	0.0325171	0.0776991	0.550932	0.220712	0.165336
Hex7HexNAc6dHex	H7N6F1	2539.9	0.0822903	0.134906	0.0700023	0.0372918	0.225767	0.0929149	0.114675	0.120382	0.0972542	0.124208	0.120535	0.0935012	0.154738	0.151026	0.273529	0.45924	0.144709	0.159598	0.516873	0.170003	0.134149	0.232045	0.203068	0.629242	0.173754	0.254058	0.0959821	0.18946	0.087924	0	0.091213	0.0787391	0.0650268	0.106216	0.498803	0.273919	0	0	0.069809	0.338784	0.281929	0.0628356	0.126988	0.193589	0.0811226	0.180162	0.238456
Hex5HexNac6dHex	H5N6F1	2215.8	0.0792537	0.150759	0.0926078	0.0593906	0.14543	0.187106	0.133088	0.0838726	0.155753	0.258209	0.0549568	0.0711823	0.446828	0.0518817	0	0.164649	0	0	0	0	0.0980499	0	0	0	0.0604986	0.195346	0.130919	0.0433867	0.0970871	0.12338	0.0839313	0.0248913	0.72955	0.0831905	0.258345	0.114841	0	0.313614	0.0821528	0.123821	0.64967	0	0.0773025	0	0.0955028	0.126073	0.0941222
Hex7HexNAc6	H7N6	2393.85	0.048281	0	0.0282766	0.0426861	0.0573387	0	0.0348459	0.104029	0	0.03043	0.0411008	0.0332203	0.0581678	0.0540138	2.23492	0.139781	0.356462	0	0	0	0	0.207904	0	0.293697	0.0434725	0.0529561	0.0451594	0.0691815	0.0347317	0	0.223827	0.458318	0	0.0772269	0.0982547	0.0436942	0	0	0.0617764	0.0943471	0.0545057	0	0.0365625	0	0.0298109	0.125998	0.181095
Hex7HexNAc7	H7N7	2596.93	0	0	0	0	0	0	0	0	0	0	0.0527786	0	0.0552018	0	1.49806	0	0.340531	0	0	0	0	0.194602	0	0	0	0.0357457	0	0	0	0	0.0471395	2.60329	0	0.0814798	0	0	0	0	0	0	0	0	0	0	0	0.122721	0.10166
Hex6HexNAc6dHex	H6N6F1	2377.85	0.202841	0.287219	0.168893	0.0853174	0.0826363	0.138096	0.0696887	0.0604241	0.159653	0.127768	0.0427934	0.0361412	0.72135	0.0579227	0	0.156302	0	0	0	0	0	0	0	0	0.0664393	0.196213	0.0780754	0.0576675	0.100781	0	0.0583629	0.0465006	0.347637	0.0563627	0.19948	0.133269	0	0.163624	0.0569819	0.142253	0.288502	0	0.0575866	0.120499	0.186068	0.0955753	0.065925
Hex3HexNAc4dHex2	H3N4F2	1631.59	0.139549	0	0.12718	0.0999375	0.122371	0.154827	0.085978	0.0443149	0.0817241	0.0268646	0.0545301	0.142122	0.0695582	0.195577	0	0.22602	0.126786	0	0	0	0.156373	0.286238	0.134451	0	0.0518897	0.147145	0.163338	0	0.135828	0.139676	0	0	0.247257	0.253584	0.164077	0.0962326	0.232327	0	0.166946	0.11432	0.0865221	0.192434	0.098997	0	0.0916666	0.104958	0.104086
Hex6HexNAc5dHex2	H6N5F2	2320.83	0.136644	0.183087	0.101246	0.0661733	0.0809921	0.115123	0.0611355	0.0555305	0.178909	0.0700015	0.0415931	0.0441101	0.083218	0.10021	0	0.160658	0.102226	0	0.241111	0	0.145927	0.178734	0.214195	0	0.0548039	0.161517	0.114175	0	0.161064	0.138863	0	0	0.12107	0.0606207	0.175931	0.697115	0	0.0832475	0.0495485	0.273578	0.0888338	0	0	0	0.121788	0.101351	0.120555
Hex4HexNAc6dHex2	H4N6F2	2199.8	0	0	0.0579975	0	0.0709475	0.149328	0.0702146	0.15159	0.371223	0.0397074	0.0463595	0.424747	0.0567319	0.0397997	0	0.152857	0	0	0	0	0.175652	0	0.134915	0.295219	0.0373879	0.148654	0.435169	0	0.0672176	0	0	0	0.203381	0.445766	0.153491	0.0775322	0	0	0.083803	0	0.134737	0.0675483	0.0571617	0	0.0144994	0.102278	0.0666457
Hex3HexNAc3dHex2	H3N3F2	1428.51	0.0640236	0	0	0.0776912	0.107292	0.0709625	0.0778348	0.134476	0.092623	0.64872	0.0823773	0.0583186	0.0785919	0.104853	0	0	0	0	0	0	0	0.129571	0.116833	0	0.0857648	0.0692337	0.0908868	0.15845	0.0885338	0.244432	0	0	0.0931889	0.117473	0	0.116997	0.167093	0.102624	0	0.0617829	0.148607	0.152376	0.048041	0.106672	0.0354287	0.0888652	0.0575298
Hex6HexNAc5dHex3	H6N5F3	2466.89	0.0810756	0.110971	0.067569	0.0421259	0.0437235	0.105933	0.0316186	0.0447013	0.0989604	0.0417739	0.0380025	0.0632646	0	0.0550799	0	0.128748	0	0	0.250554	0	0.257765	0.396566	0.367191	0	0	0.148088	0.101061	0	0.0981229	0	0	0	0.0903815	0.0431885	0.111304	0.523922	0	0	0.0517575	0.19985	0	0.0557666	0	0	0.0754354	0.0836831	0.117171
Hex3HexNAc5dHex2	H3N5F2	1834.67	0.0810756	0.127446	0.0558414	0.130176	0.0888219	0.128651	0.0590565	0.0435233	0.0735767	0	0.0556314	0.106961	0.0491668	0.113003	0	0.18316	0	0	0	0	0	0	0.160414	0	0.0738917	0.0886644	0.143466	0.0606597	0.0566789	0.218049	0	0	0.155123	0.263679	0.263897	0	0	0.134918	0	0.145776	0.135727	0.110748	0.0657188	0.114573	0.0986347	0.0773384	0.0657466
Hex6HexNAc4dHex	H6N4F1	1971.69	0.125409	0.109546	0.124944	0.0941718	0.0855745	0.192722	0.0839944	0.0510894	0.0992042	0.057724	0.063119	0.0577016	0.297801	0.0504603	0	0	0.157764	0.215005	0	0	0	0	0.131669	0	0.0908573	0.0586285	0.12209	0.0530271	0.0946065	0.0852326	0.0839426	0.0518939	0.221263	0.0777803	0.132539	0.0403563	0	0	0.0834941	0.0782427	0	0.0752561	0.0415141	0.0900312	0.113518	0.0756146	0.0522936
Hex4HexNAc6	H4N6	1907.69	0	0	0.0954816	0	0	0	0	0.00724455	0	0	0	0	0	0	0.270107	0.0510687	0.486586	0.0722114	0	0	0	0	0	0.0166733	0	0	0	0.0780718	0	0	0	1.83618	0.389926	0	0	0	0	0	0	0	0.0357136	0	0	0	0.0238704	0.0810944	0.046618
Hex6HexNAc2dHex	H6N2F1	1565.53	0.102987	0.114701	0.0753449	0.0732773	0.0518024	0.0580509	0.0881888	0.0513743	0.0894885	0.0609735	0.0810775	0.0801976	0.0493234	0.0563947	0.184039	0.182323	0	0	0.210015	0	0.088091	0.158145	0	0	0.128538	0.0720087	0.0724461	0.0457525	0.058483	0.0946691	0	0.0526681	0.0875211	0.254351	0	0.0518757	0.145348	0.0828772	0	0.0791825	0.0942507	0.0715964	0.090606	0	0.0915776	0.0742915	0.0719175
Hex5HexNAc3dHex2	H5N3F2	1752.62	0.0621019	0	0.0882283	0.0797801	0.0569668	0.0897411	0.0704868	0.113345	0.292494	0.0783815	0	0.219287	0.0789989	0.079244	0	0	0	0	0	0	0	0.256275	0.196577	0	0.0592378	0.0720634	0.14347	0	0.113685	0.0903386	0.094279	0	0.20813	0.105941	0	0.137602	0.11788	0	0.0895306	0.108014	0	0.181438	0	0	0.0575276	0.0763351	0.0543658
Hex3HexNAc6dHex2	H3N6F2	2037.75	0.137252	0.25054	0.169633	0.134319	0.0747974	0.0852571	0	0	0.0748297	0	0.0534918	0.0807567	0.0718257	0.102342	0	0.269383	0	0	0	0	0	0.189675	0	0	0	0.0516895	0.132137	0	0.0550935	0.128812	0	0	0.16687	0.155444	0.179522	0.0544821	0.0858352	0.0954476	0	0	0.0653869	0.0824717	0	0	0.172936	0.0563888	0.0511102
Hex6HexNAc5dHex4	H6N5F4	2612.95	0.0494956	0.0808193	0.0409394	0	0.0470233	0.0816835	0.0315694	0.0638012	0.0953042	0.0178609	0	0.0859976	0	0.0302051	0	0	0	0	0	0	0.229918	0.511098	0.428389	0	0	0.0845876	0.153896	0	0.0727448	0	0.048666	0	0.0777673	0.0421736	0	0.202212	0	0	0	0.145776	0	0.0534102	0	0	0.0428136	0.0626021	0.0785402
Hex5HexNAc6dHex2	H5N6F2	2361.87	0.0501029	0	0.0492678	0.0483412	0.0478483	0.115378	0.104233	0.0430266	0.138203	0.0494497	0	0.100084	0.0882207	0.0497496	0	0.13246	0	0	0	0	0.145305	0	0	0	0	0.161671	0.198183	0	0.0408298	0.0876853	0.0670684	0	0.267996	0.0761588	0.216324	0.0960422	0	0	0.0633472	0.0869385	0.117895	0	0.0318325	0	0.036928	0.0631483	0.0445072
Hex5HexNAc6dHex3	H5N6F3	2507.91	0.0543541	0.0770892	0.0488999	0.0321124	0.0362987	0.10721	0.0612337	0.0825954	0.182809	0	0.047786	0.18343	0.04372	0	0	0	0	0	0.212267	0	0.173152	0.192139	0.127497	0	0	0.10319	0.353121	0	0.0381553	0	0	0	0.116915	0.171661	0	0.0810247	0	0	0.0699458	0	0.0356656	0	0	0	0.0531139	0.0604954	0.0445846
Hex6HexNAc4	H6N4	1825.63	0.0971693	0.184641	0.0774007	0.104288	0	0.132181	0.0211736	0.00405129	0.124066	0	0	0.0390714	0.0713895	0.0838636	0.0406769	0	0.159091	0.226448	0	0	0	0	0	0.276958	0.027212	0.0188311	0.0211407	0	0.0128861	0	0	0.48551	0.165965	0	0	0.0391628	0.0651273	0.00812747	0	0	0.0359286	0.067584	0	0	0.115875	0.0531612	0.0459552
Hex6HexNAc7	H6N7	2434.87	0	0	0	0	0	0	0	0	0	0	0	0	0.0384691	0	0.306601	0	0.265742	0	0	0	0	0	0	0	0	0.0361117	0	0	0	0	0.0578705	1.52784	0	0	0	0	0	0	0	0	0	0	0	0	0	0.0558158	0.0286172
Hex4HexNAc4dHex3	H4N4F3	1939.7	0	0	0.0265375	0.0987541	0.0671739	0	0	0.0947127	0.0570363	0.0490069	0.0638335	0.0302095	0	0.0476175	0	0	0.212196	0	0	0	0	0.233523	0	0.356088	0	0	0	0	0.0419644	0.145883	0.0931293	0.036534	0	0.190401	0	0.0925497	0	0	0.0950208	0	0	0	0	0	0.0313229	0.047672	0.0494689
Hex6HexNAc6dHex2	H6N6F2	2523.91	0.073788	0.104754	0.071295	0	0	0.0972544	0.0580434	0.0311144	0.0772671	0.0367551	0	0.0350527	0.266082	0	0	0	0	0	0	0	0.0720404	0	0	0	0.0275357	0.142036	0.0816461	0	0.0345222	0	0	0	0.223449	0.0363182	0.168751	0.130127	0	0	0.0528408	0.0913293	0.0789805	0	0	0	0.0624593	0.0435286	0.0297034
Hex6HexNAc6dHex3	H6N6F3	2669.97	0.0543541	0.081441	0.0752577	0.0448418	0	0.0781098	0.0751133	0.0265265	0.0801921	0.0149087	0.036605	0.0480428	0.0824955	0	0	0.0892362	0	0	0.185241	0	0.127454	0.227383	0	0	0	0.102045	0.127276	0	0.0247088	0	0	0	0.154234	0.0400531	0	0.139348	0	0	0.0417272	0	0.0280702	0	0	0	0.0639736	0.0432193	0.041923
Hex6HexNAc3dHex2	H6N3F2	1914.67	0.0537468	0	0.0419819	0.0849424	0.0398545	0.0625389	0.0623223	0.0767124	0.111391	0.0385265	0.0563447	0.104341	0.0629776	0	0	0.18835	0	0	0	0	0	0	0	0	0.0775547	0	0.0679951	0	0.066013	0	0.0518501	0	0.0933207	0.0440343	0.0620684	0.062864	0	0	0.0917214	0.0350442	0.057131	0.0879698	0.0482622	0	0.0451678	0.0412297	0.0316706
Hex6HexNAc6dHex4	H6N6F4	2816.03	0.0337056	0.0534651	0.0687062	0	0	0.070452	0.0304808	0.0351154	0.0658111	0	0.0331649	0.0750394	0.0338309	0	0	0	0	0	0.164972	0	0.133524	0.386741	0.108488	0	0	0.079232	0.169308	0	0.0242483	0	0	0	0.0732858	0.0284542	0	0.0590223	0	0	0.039592	0	0	0	0	0	0.0389692	0.040269	0.0446169
Hex5HexNAc5dHex4	H5N5F4	2450.89	0.0431189	0	0	0	0	0.0804072	0.02912	0.0840791	0.0867732	0	0.0841604	0.0333509	0.0485711	0	0	0	0.100455	0	0	0	0	0.700075	0	0	0	0	0.056436	0	0.0543803	0	0	0	0.0411244	0.141996	0	0.0426078	0	0.059565	0.0613676	0	0	0	0	0	0.0107797	0.0426117	0.0482035
Hex4HexNAc3dHex3	H4N3F3	1736.62	0	0	0	0	0.0769973	0	0	0.146891	0	0	0.0591976	0.0578876	0.0689631	0.0689387	0	0	0.132761	0	0	0	0	0.334923	0	0	0.0616395	0	0	0	0.0807681	0.128812	0	0	0.0653449	0.177613	0	0	0	0	0.127354	0	0	0	0	0.130376	0	0.0429617	0.0362707
Hex4HexNAc6dHex3	H4N6F3	2345.86	0	0	0.0267244	0	0	0.0451812	0	0.0521785	0.0541114	0	0	0.0435943	0	0	0	0.128581	0	0	0	0	0	0	0	0.497611	0	0	0.0494002	0	0	0	0	0	0.0382246	0.526652	0	0	0	0	0	0	0	0	0	0.102721	0.00668109	0.0384564	0.0364456
Hex5HexNAc6dHex4	H5N6F4	2653.97	0.04737	0.0590602	0.0377174	0.0286594	0	0.036247	0	0.0709727	0.0316868	0	0.0331649	0.0309686	0	0.0334033	0	0	0	0	0	0	0	0.230567	0	0.192501	0	0.0328247	0.0580225	0	0.0242483	0	0	0	0.0274163	0.242066	0	0	0	0	0.0422315	0	0	0	0	0	0.0432018	0.027158	0.0232649
Hex5HexNAc4dHex4	H5N4F4	2247.81	0	0	0	0.0484009	0.0450984	0	0	0.0983756	0	0	0.0602674	0	0	0	0	0	0	0	0	0	0	0.451772	0	0.251849	0.0363774	0	0	0	0.0643649	0	0	0	0	0.112134	0	0	0	0	0.0831432	0	0	0	0	0	0.0121002	0.0300845	0.0393382
Hex8HexNAc7	H8N7	2758.98	0	0	0	0	0	0	0	0.0353911	0	0	0	0	0.0252404	0.0255855	0.352125	0.0857203	0.0825328	0	0	0	0	0.479362	0	0	0	0	0	0	0.0442174	0	0	0.0349126	0	0.0112459	0	0	0	0	0.0567485	0	0	0	0	0	0	0.030827	0.0528244
Hex7HexNAc6dHex4	H7N6F4	2978.08	0.0300618	0	0.0165843	0	0	0.0375233	0.0231819	0	0.0260807	0	0	0.0245367	0	0.0213213	0	0	0	0	0.146391	0	0.142806	0.21458	0.122397	0	0	0.0741385	0.04669	0	0.0199692	0	0	0	0.0202986	0	0	0.25425	0	0	0	0	0	0	0	0	0.0116615	0.0293541	0.0440212
Hex9HexNAc8	H9N8	3124.11	0	0	0.0154471	0	0.0222742	0.0193998	0	0.0190414	0.036318	0.0110708	0.0196137	0	0	0	0.117505	0	0	0	0	0	0.148161	0.390682	0.188695	0	0	0.0407479	0.0818208	0	0	0	0	0	0	0	0	0.0803262	0	0	0	0	0	0	0	0	0.00386176	0.0293914	0.0462685
Hex8HexNAc8	H8N8	2962.06	0	0	0	0	0	0.0336944	0.02912	0.0363519	0	0	0	0	0	0	0.255631	0	0.0800989	0	0	0	0	0.492664	0	0	0	0	0	0	0	0	0	0.0390724	0	0.0761401	0	0	0	0	0.0428913	0	0	0	0	0	0	0.0271416	0.0435642
Hex7HexNAc6dHex2	H7N6F2	2685.96	0.0385641	0	0.0185104	0	0.0442734	0	0.0252791	0.0276914	0.0326618	0.0315839	0	0	0.0442628	0.0501049	0	0	0	0	0	0	0.0665766	0	0	0	0.0275357	0.0800109	0	0	0	0	0	0	0.0276306	0	0	0.431912	0	0	0	0.0834258	0.0412027	0	0	0	0.0142686	0.0253538	0.0311559
Hex8HexNAc2dHex	H8N2F1	1889.64	0.0360034	0	0.0306729	0.0536656	0	0	0.0441129	0.0417032	0.0609362	0.0210065	0.0416674	0.0381562	0	0.0271076	0	0.12018	0	0	0	0	0.138165	0	0	0	0.0391244	0.0359777	0	0	0.0354167	0.0667973	0	0.0303994	0.0451858	0.132973	0	0	0	0	0	0	0	0	0	0	0.0300855	0.0229727	0.0129173
Hex7HexNAc3	H7N3	1784.61	0	0	0.0559436	0.0726922	0	0	0.0491651	0	0.0587425	0	0.0516171	0	0.0553006	0.0685834	0	0	0	0	0	0	0	0	0	0	0.0693253	0.0524546	0.0601204	0	0.0504873	0	0.0997392	0.0571904	0.0637237	0.0601959	0	0	0	0	0	0	0.0569165	0	0.0296834	0	0.032159	0.0220811	0.00432999
Hex2HexNAc3	H2N3	974.34	0.0677149	0	0	0	0	0	0	0.0801225	0	0.102442	0	0	0.059074	0.079244	0	0	0	0	0	0	0	0	0	0.133914	0	0	0	0.0957499	0.0732797	0	0.119957	0	0	0	0	0	0	0	0	0.100111	0	0	0.0664034	0	0.0169287	0.0227574	0.0150214
Hex7HexNAc2dHex	H7N2F1	1727.59	0.0274596	0	0.0352161	0.0479928	0	0.0466092	0	0.0475375	0.0515836	0.033231	0.0481574	0.0600767	0.0460415	0.0763554	0	0	0	0	0	0	0.111389	0	0	0	0.037001	0	0	0	0	0	0	0.0498129	0.0713086	0.0931781	0	0	0	0.0584599	0	0	0	0	0.0284724	0	0.0276671	0.0214804	0.00991605
Hex4HexNAc7dHex	H4N7F1	2256.83	0	0	0	0	0	0.059731	0.0519806	0.0400612	0.0392429	0	0	0.0466912	0.0478838	0	0	0	0	0	0	0	0	0	0	0	0	0.0577262	0.0870338	0	0	0	0	0	0.11731	0.124791	0.129256	0	0	0.0918593	0	0	0	0	0.0434702	0	0	0.0234259	0.0132293
Hex7HexNac6dHex3	H7N6F3	2832.02	0.0242923	0	0.0179641	0	0	0.0257813	0	0.0263732	0.0482615	0.0152039	0	0	0	0.0248748	0	0.0781863	0	0	0	0	0.0803723	0	0.0843797	0	0	0.0857116	0.0275767	0	0.0219304	0	0	0	0	0	0	0.353807	0	0	0	0	0	0	0	0	0.0105641	0.0218115	0.0298372
Hex6HexNAc4dHex2	H6N4F2	2117.75	0.0677149	0.117188	0.0518245	0	0	0.143457	0.0399457	0	0.0446053	0	0	0.0443046	0.0477482	0	0	0	0	0	0	0	0	0	0	0	0	0.0450265	0.0746155	0	0.0456665	0	0	0	0.0753475	0	0	0	0	0	0	0.0695634	0	0	0	0	0.0591818	0.015757	0.00347817
Hex8HexNAc7dHex	H8N7F1	2905.04	0.0291508	0	0	0	0.0241992	0	0	0.0351154	0	0.0165324	0.0295988	0	0.0200026	0.0302051	0	0.100788	0	0	0.143013	0	0	0.243376	0	0	0.0180624	0.0339288	0	0.0289698	0.0201474	0	0	0	0	0.0442997	0	0.0342567	0	0	0	0	0	0	0	0	0.0072877	0.0205624	0.0260717
Hex4HexNAc7	H4N7	2110.77	0	0	0	0.0517941	0	0	0	0	0	0	0	0	0	0	0	0	0.185201	0	0	0	0	0	0	0	0	0	0	0.0614758	0	0	0	0.252856	0.0735494	0.0868195	0.121177	0	0	0	0	0	0	0	0	0	0.0129485	0.019527	0.0153189
Hex5HexNAc7	H5N7	2272.82	0	0	0	0	0	0	0	0	0	0	0	0	0.0438003	0	0	0	0.1675	0	0	0	0	0	0	0	0	0	0	0	0	0	0	0.534386	0.0425979	0	0	0	0	0	0	0	0	0	0	0	0	0.0197071	0.00837498
Hex2HexNAc4dHex	H2N4F1	1323.48	0.0614682	0	0.0572923	0.0752741	0	0.0493849	0	0.0469596	0.0962792	0.0501421	0	0.0438318	0	0	0	0	0	0	0	0	0	0	0	0	0	0.0624424	0.0811409	0	0.0509927	0	0	0.0335183	0	0.0728772	0	0	0	0	0	0	0	0	0	0	0.0485087	0.0146892	0
Hex4HexNAc7dHex2	H4N7F2	2402.88	0	0	0	0	0	0.0449259	0	0.0680052	0.0555738	0	0	0.080042	0.0325298	0	0	0	0	0	0	0	0	0	0	0	0	0.04603	0.134857	0	0	0	0	0	0.0424425	0.20014	0	0	0	0	0	0	0	0	0	0	0	0.0176136	0
Hex7HexNAc7dHex	H7N7F1	2742.98	0.0318837	0	0.0181953	0	0	0.0365023	0.0284416	0.0229981	0	0	0	0	0.424913	0	0	0	0	0	0	0	0	0	0	0	0	0.0908052	0	0	0	0	0	0	0.0291251	0	0	0	0	0	0	0	0	0	0	0	0.0125197	0.0158196	0
Hex7HexNAc4	H7N4	1987.69	0	0	0.0340065	0	0	0	0	0	0	0	0	0	0.0547749	0	0.344732	0	0	0	0	0	0	0	0	0	0	0	0	0.0542744	0.0532514	0	0	0.0622925	0.0748977	0	0	0	0	0	0	0	0	0	0	0	0.00850162	0.0161056	0.0172366
Hex8HexNAc3	H8N3	1946.66	0	0	0	0	0.0657227	0.0533495	0.050892	0	0.0528926	0.0334493	0	0	0.0460621	0.0646745	0	0	0	0	0	0	0	0	0	0	0.0735127	0	0	0.0595717	0.0604423	0	0	0	0	0	0	0	0	0	0	0	0	0	0	0.111281	0	0.0167963	0.00556404
Hex7HexNAc7dHex2	H7N7F2	2889.04	0	0	0.019522	0	0	0.036247	0.0442775	0	0	0	0	0	0.286961	0	0	0	0	0	0	0	0	0	0	0	0	0.0873152	0.035252	0	0	0	0	0	0.0326146	0	0	0.0436555	0	0	0	0	0	0	0	0	0.00488051	0.0141581	0.00218278
Hex6HexNAc7dHex	H6N7F1	2580.93	0	0	0	0	0	0	0.0347573	0	0	0	0	0	0.10982	0	0.195322	0	0	0	0	0	0	0	0	0	0	0.0730877	0	0	0	0	0	0	0.0453453	0	0.118159	0	0	0	0	0	0	0	0	0	0	0.0144123	0.0156741
Hex4HexNAc7dHex3	H4N7F3	2548.94	0	0	0	0	0	0	0	0.0294277	0	0	0	0.0283482	0	0	0	0.0984445	0	0	0	0	0	0	0	0	0	0	0	0	0	0	0	0	0	0.320382	0.08258	0	0	0	0	0	0	0	0	0	0	0.0139796	0.00905122
Hex5HexNAc7dHex2	H5N7F2	2564.94	0	0	0	0	0	0.041097	0.0457212	0	0	0	0.0292422	0.0374006	0	0	0	0	0	0	0	0	0	0	0	0	0	0.0409365	0.0994996	0	0	0	0	0	0.0449468	0.0707639	0.0735877	0	0	0	0	0	0	0	0.0243023	0	0	0.0126874	0.0048945
Hex5HexNAc7dHex	H5N7F1	2418.88	0	0	0	0	0	0.0439049	0.0337466	0	0	0	0	0	0.0616376	0	0	0	0	0	0	0	0	0	0	0	0	0.0517815	0.0383182	0	0	0	0	0	0.0608255	0.0423798	0.124768	0	0	0	0	0	0	0	0.0325171	0	0	0.012247	0.00786424
Hex9HexNAc8dHex	H9N8F1	3270.17	0	0	0	0	0	0	0	0	0	0	0	0	0	0	0	0	0	0	0	0	0	0.382307	0	0	0	0	0	0	0.0188994	0	0	0	0	0	0	0	0	0	0	0	0	0	0	0	0	0.0100302	0.0191153
Hex6HexNAc7dHex4	H6N7F4	3019.1	0	0	0	0	0	0.0222077	0.034563	0.0301696	0.0194996	0	0	0.0295393	0.0229009	0	0	0	0	0	0	0	0	0	0	0	0	0	0.104713	0	0	0	0	0	0	0.0840507	0	0	0	0	0.0376124	0	0	0	0	0	0	0.00963139	0.00188062
Hex6HexNAc7dHex3	H6N7F3	2873.05	0	0	0	0	0	0	0.0819171	0	0	0	0.0267459	0	0.037214	0	0	0	0	0	0	0	0	0	0	0	0	0.0386728	0.0720749	0	0	0	0	0	0.0257027	0.0442997	0	0	0	0	0.0389321	0	0	0	0	0	0	0.00913898	0.00194661
Hex7HexNAc7dHex3	H7N7F3	3035.1	0	0	0.0173424	0	0	0.0324181	0.0421907	0	0	0	0	0	0.122622	0	0	0	0	0	0	0	0	0	0	0	0	0.0415025	0.0425041	0	0	0	0	0	0.0209576	0	0	0.044354	0	0	0	0	0	0	0	0	0.0043356	0.00866372	0.0022177
Hex8HexNAc9	H8N9	3165.16	0	0	0	0	0	0	0	0.0393194	0	0	0	0	0	0	0	0	0	0	0	0	0	0.155682	0	0	0	0	0.0328643	0	0	0	0	0	0	0.0937413	0	0	0	0	0.0389321	0	0	0	0	0	0	0.00901347	0.00973069
Hex4HexNAc3dHex4	H4N3F4	1882.68	0	0	0.0771762	0	0	0.0553916	0.0332835	0	0	0	0	0	0	0	0	0	0	0	0	0	0	0	0	0	0.0202968	0	0	0.0271708	0.0461614	0	0	0	0.0938978	0	0	0	0	0	0	0	0	0	0	0	0.0192941	0.00690505	0
Hex6HexNAc7dHex2	H6N7F2	2726.99	0	0	0	0	0	0.0270576	0.0530692	0	0	0	0	0	0.0627174	0	0	0	0	0	0	0	0	0	0	0	0	0.0630083	0.0727548	0	0	0	0	0	0.0340067	0.0365868	0	0	0	0	0	0	0	0	0	0	0	0.00873002	0
Hex9HexNAc8dHex2	H9N8F2	3416.23	0	0	0	0	0	0	0	0.0150848	0	0	0	0	0	0	0	0	0	0	0	0	0	0.240912	0	0	0	0	0	0	0	0	0	0	0	0	0	0	0	0	0	0	0	0	0	0	0	0.00639993	0.0120456
Hex7HexNAc4dHex	H7N4F1	2133.75	0	0	0.0318721	0	0	0.0681546	0	0	0	0	0	0	0	0	0	0	0	0	0	0	0	0	0	0	0	0	0	0	0	0	0	0	0.0543879	0	0	0	0	0.0753534	0	0	0	0	0	0	0.00796801	0.0049474	0.00376767
Hex7HexNAc7dHex4	H7N7F4	3181.16	0	0	0.0175319	0	0	0.0265471	0.0310251	0	0	0	0.0217533	0	0.0400767	0	0	0	0	0	0	0	0	0	0	0	0	0	0.0509846	0	0	0	0	0	0	0	0	0.0366707	0	0	0	0	0	0	0	0	0.00438298	0.00517644	0.00183353
Hex3HexNAc3dHex4	H3N3F4	1720.63	0	0	0.0491123	0.0358749	0	0	0	0	0	0	0	0	0	0	0	0	0	0	0	0	0	0	0	0	0	0	0	0.0484955	0	0	0	0	0.0689913	0.02103	0	0	0	0	0	0	0	0	0	0	0.0212468	0.00346292	0
Hex5HexNAc3dHex3	H5N3F3	1898.68	0	0	0	0	0.0604979	0	0	0.0464908	0	0	0	0	0	0	0	0	0	0	0	0	0	0	0	0	0	0	0	0	0	0	0	0	0	0	0	0	0.112158	0	0	0	0	0	0	0	0	0.00547867	0.0056079
Hex9HexNAc9	H9N9	3327.22	0	0	0.0169633	0	0	0	0.0185062	0.0175202	0	0	0	0	0	0	0	0	0	0	0	0	0	0	0	0	0	0.0196194	0.0607423	0	0	0	0	0	0	0	0	0.0275903	0	0	0.0308005	0	0	0	0.0249868	0	0.00424083	0.00499414	0.00416888
Hex8HexNAc4	H8N4	2149.74	0	0	0.0141176	0	0	0	0	0	0	0	0	0	0	0	0	0	0	0	0	0.166307	0	0	0	0	0	0	0	0	0	0	0	0	0	0	0	0	0	0	0	0	0	0	0	0	0.00352939	0.00415767	0.00831535
Hex8HexNAc9dHex	H8N9F1	3311.19	0	0	0	0	0	0	0	0.0299223	0	0	0	0	0	0	0	0	0	0	0	0	0	0	0	0	0	0	0	0	0	0	0	0	0	0.0925547	0	0	0	0	0.0316736	0	0	0	0	0	0	0.00385376	0.00158368
Hex7HexNAc5dHex	H7N5F1	2336.82	0	0	0	0	0	0	0	0	0	0	0	0	0	0	0.00614644	0	0	0	0	0	0	0	0	0	0	0	0.0479368	0	0	0	0	0	0	0	0	0	0	0	0	0.0758536	0	0	0	0	0	0.00324842	0.0041
Hex3HexNAc2dHex2	H3N2F2	1225.43	0	0	0	0	0	0	0	0.0544041	0	0	0	0	0	0	0	0	0	0	0	0	0	0	0	0	0	0	0	0	0	0	0.0514031	0	0	0	0	0	0	0	0	0	0	0	0	0	0	0.00264518	0
Hex8HexNAc7dHex3	H8N7F3	3197.15	0	0	0	0	0	0	0	0	0	0	0	0	0	0	0	0	0	0	0	0	0	0	0	0	0	0	0	0	0	0.0581982	0	0	0	0	0	0.032324	0	0	0	0	0	0	0	0	0	0.00226305	0.0016162
Hex5HexNAc3dHex4	H5N3F4	2044.73	0	0	0	0.0517201	0	0	0	0	0	0	0	0	0	0	0.00200984	0	0	0	0	0	0	0	0	0	0	0	0	0	0	0	0	0.0285661	0	0	0	0	0	0	0	0	0	0	0	0	0.01293	0.000764398	0.000100492
Hex8HexNAc8dHex4	H8N8F4	3546.29	0	0	0.0114668	0	0	0	0	0	0	0	0	0	0	0	0	0	0	0	0	0	0	0	0	0	0	0	0	0	0	0	0	0	0	0	0.0592422	0	0	0	0	0	0	0	0	0	0.00286671	0.00148106	0.00296211
Hex10HexNAc10dHex	H10N10F1	3838.38	0	0	0	0	0	0	0	0	0	0	0	0	0	0	0	0	0	0.0668504	0	0	0	0	0	0	0	0	0	0	0	0	0	0	0	0	0	0	0	0	0	0	0	0	0	0	0	0.00167126	0.00334252
Hex11HexNAc2	H11N2	2229.74	0	0	0	0	0	0	0	0	0	0	0	0	0	0	0	0	0	0	0	0	0	0	0	0	0	0	0	0	0	0	0	0	0	0	0	0	0	0	0.0620275	0	0	0	0	0	0	0.00155069	0.00310137
Hex6HexNAc4dHex4	H6N4F4	2409.87	0	0	0	0	0	0.0339497	0	0.0257172	0	0	0	0	0	0	0	0	0	0	0	0	0	0	0	0	0	0	0	0	0	0	0	0	0	0	0	0	0	0	0	0	0	0	0	0	0	0.00149167	0
Hex10HexNAc10dHex2	H10N10F2	3984.44	0	0	0	0	0	0	0	0	0	0	0	0	0	0	0	0	0	0	0	0	0	0	0.0519259	0	0	0	0	0	0	0	0	0	0	0	0	0	0	0	0	0	0	0	0	0	0	0.00129815	0.0025963
Hex6HexNAc4dHex3	H6N4F3	2263.81	0	0	0	0	0	0	0	0	0	0	0	0	0	0.0362461	0	0	0	0	0	0	0	0	0	0	0	0	0	0	0	0	0	0	0	0	0	0	0	0	0	0	0	0	0	0	0	0.000906153	0
[truncated: 13 more columns]

## Sheet: Neutral-Sugar class table
Neutral N-glycan structural features		AH33-31-11-1	AH34-1-11-1	AH34-6-11-1	AH34-14-11-1	AH33-31-1-1	AH33-31-2-1	AH33-31-3-1	AH33-31-4-1	AH33-31-5-1	AH33-31-6-1	AH33-31-7-1	AH33-31-8-1	AH33-31-9-1	AH33-31-10-1	AH34-1-1-1	AH34-1-2-1	AH34-1-3-1	AH34-1-4-1	AH34-1-5-1	AH34-1-6-1	AH34-1-7-1	AH34-1-8-1	AH34-1-9-1	AH34-1-10-1	AH34-6-1-1	AH34-6-2-1	AH34-6-3-1	AH34-6-4-1	AH34-6-5-1	AH34-6-6-1	AH34-6-7-1	AH34-6-8-1	AH34-6-9-1	AH34-6-10-1	AH34-14-1-1	AH34-14-2-1	AH34-14-3-1	AH34-14-4-1	AH34-14-5-1	AH34-14-6-1	AH34-14-7-1	AH34-14-8-1	AH34-14-9-1	AH34-14-10-1
		Normal colon				MSI Stage IV BRAFwt										MSI CRC Stage II BRAFwt										MSI CRC Stage IV BRAFmut										MSI CRC Stage II BRAFmut										AVERAGES
		A	B	C	D	500	501	502	503	504	505	506	507	508	509	600	601	602	603	604	605	606	607	608	609	700	701	702	703	704	705	706	707	708	709	800	801	802	803	804	805	806	807	808	809	Normal	MSI CRC	MSI CRC St II	MSI CRC St IV
Short	Class name	%	%	%	%	%	%	%	%	%	%	%	%	%	%	%	%	%	%	%	%	%	%	%	%	%	%	%	%	%	%	%	%	%	%	%	%	%	%	%	%	%	%	%	%	%	%	%	%
N2	2 HexNAc	58.0905	51.1033	51.8988	61.807	50.7097	43.6191	65.1096	64.5882	50.7799	55.5947	65.2774	52.0423	60.6935	65.6518	46.1364	69.9484	69.066	27.7562	51.6967	76.7814	51.8139	61.6878	58.3614	34.7555	65.8773	62.4425	55.883	52.8608	50.1284	67.8038	57.1176	33.2882	41.4403	60.9891	42.0187	64.1029	83.5101	66.9918	66.3765	38.8216	76.0101	61.779	58.8674	55.9357	55.7249	57.1079	58.1209	56.0949
N3	3 HexNAc	4.47	3.35492	5.21111	4.7557	8.5766	4.83131	4.58605	8.68986	7.56263	9.91572	4.83677	7.45224	6.16924	7.7562	3.76547	4.22682	3.80115	5.06779	4.30702	3.91504	4.08392	6.57982	6.03871	6.00304	6.83564	5.22052	5.60309	8.49733	7.51158	6.68847	7.62481	3.16446	6.75471	5.14744	7.1604	6.75653	4.57607	5.5554	4.78355	6.87391	5.77044	5.76443	4.7627	6.75495	4.44793	5.9993	5.32736	6.67123
N4	4 HexNAc	20.8937	26.062	25.1937	21.0389	32.1198	34.5904	22.2224	20.1255	26.5135	26.4921	24.445	29.2128	21.4513	20.8234	19.0098	17.2164	16.9967	60.2826	33.6828	16.2953	35.1355	18.7836	26.9403	47.0607	22.0185	21.2999	24.1198	30.8446	34.1837	19.2105	27.1045	24.0666	29.0734	20.348	39.328	19.7412	9.73571	19.3867	22.4219	43.5791	10.2522	27.1341	28.9321	29.7704	23.2971	26.2988	27.0843	25.5133
N5	5 HexNAc	15.3746	18.0619	16.2585	11.6813	7.60562	15.037	6.60584	5.13178	13.1261	6.70596	4.69411	9.56516	7.83709	4.95271	19.8532	6.25288	7.0341	6.5947	8.94475	2.8383	7.30729	8.48818	7.63821	9.91798	4.76045	8.23041	11.1598	7.15943	7.31806	5.60945	7.12193	23.6132	18.081	9.79942	8.63426	6.65441	2.09231	7.05463	5.40766	9.76452	5.21996	5.02785	6.73725	7.0201	15.3441	8.31493	7.42413	9.20573
N6	6 HexNAc	1.09248	1.41801	1.32153	0.66527	0.94177	1.49843	0.92971	1.04627	1.86725	1.25331	0.56695	1.50557	2.41724	0.76003	8.50983	2.07051	1.98049	0.23181	1.22574	0.17	1.51132	1.88103	0.78074	2.26277	0.48998	2.00809	2.32128	0.54747	0.77505	0.59088	0.92618	10.8774	4.08129	2.28465	2.14997	2.44577	0.08584	0.91965	0.73283	0.9609	2.74732	0.2946	0.5568	0.51887	1.12432	1.74314	1.60184	1.88444
N7+	7 HexNAc or larger	0.07863	0	0.1164	0.05179	0.04647	0.42373	0.54637	0.41841	0.15063	0.03821	0.17973	0.22202	1.43164	0.05579	2.72524	0.28495	1.12161	0.06685	0.14301	0	0.14816	2.57959	0.24062	0	0.01806	0.79848	0.91312	0.09042	0.0832	0.09693	0.10496	4.9901	0.5692	1.43137	0.70877	0.29918	0	0.09186	0.27759	0	0	0	0.14373	0	0.061705	0.536	0.441558	0.630442
F	Fucosylation	44.6522	49.9704	46.3334	38.1709	57.8576	64.4423	48.3353	48.1041	56.3827	56.5151	58.2817	55.4781	57.1205	53.0101	17.4352	44.2781	29.6325	69.0688	53.2368	50.9626	59.6958	53.7232	61.6763	65.0349	42.9365	53.0074	54.1046	47.5113	53.2192	57.3451	34.5105	24.75	60.6012	48.2761	62.1713	48.9433	33.0006	52.9475	49.0293	61.8138	51.1683	48.2116	55.0808	55.3535	44.7817	51.3563	51.1232	51.5895
E	Complex fucosylation	5.91432	6.90579	5.87413	3.70328	3.5187	7.2585	3.76169	4.27148	9.65426	3.57213	2.14748	6.05276	3.68952	3.28736	0.32028	4.2717	2.14231	0.6143	5.03606	0.69849	6.32051	12.1178	6.20515	4.52795	1.76443	5.26929	9.01286	1.07612	5.1585	3.80797	1.55813	0.30297	8.77132	7.72913	3.61995	8.985	1.72128	1.71262	3.1397	5.34202	2.38935	3.25301	1.04911	2.00851	5.59938	4.17849	3.77375	4.58323
nM	High-mannose type	38.7737	37.6048	36.6324	47.7843	28.807	24.8712	40.9681	34.8544	32.604	29.5318	30.8624	34.9877	30.0123	33.1614	31.5524	44.2874	47.4512	16.8939	33.4629	35.1707	32.5148	33.6537	28.002	16.3352	42.9659	33.3632	31.6135	26.6065	32.3463	29.6441	36.822	26.4292	26.028	40.0485	19.4408	39.1591	56.6646	33.7789	39.3524	23.6403	35.4158	40.8687	35.4737	29.364	40.1988	32.9752	33.6241	32.3264
nL	Paucimannose	19.3169	13.4985	15.2663	14.0227	21.9027	18.7478	24.1415	29.7337	18.1759	26.0629	34.4151	17.0546	30.6812	32.4904	14.584	25.661	21.6148	10.8623	18.2338	41.6107	19.299	28.0341	30.3594	18.4203	22.9114	29.0794	24.2695	26.2542	17.7821	38.1597	20.2956	6.85896	15.4124	20.9406	22.5779	24.9438	26.8455	33.2128	27.024	15.1813	40.5943	20.9104	23.3937	26.5716	15.5261	24.1326	24.4967	23.7685
nH	Hybrid-type	4.47	3.35492	5.21111	4.7557	8.5766	4.83131	4.58605	8.68986	7.56263	9.91572	4.83677	7.45224	6.16924	7.7562	3.76547	4.22682	3.80115	5.06779	4.30702	3.91504	4.08392	6.57982	6.03871	6.00304	6.83564	5.22052	5.60309	8.49733	7.51158	6.68847	7.62481	3.16446	6.75471	5.14744	7.1604	6.75653	4.57607	5.5554	4.78355	6.87391	5.77044	5.76443	4.7627	6.75495	4.44793	5.9993	5.32736	6.67123
nC	Complex-type	37.378	45.5418	42.8329	33.362	40.7137	51.5002	30.3043	26.675	41.5612	34.4395	29.8858	40.4617	33.1373	26.592	50.0981	25.8248	27.1329	67.176	43.9963	19.3036	44.1022	31.7324	35.5999	59.2415	27.287	32.2745	38.4328	38.6419	42.3091	25.5077	35.2576	63.5139	51.805	33.7906	50.821	29.1406	11.9139	27.4529	28.84	54.3045	18.2195	32.4566	36.3699	37.3094	39.7787	36.8782	36.5518	37.2045
nO	Other	0.06146	0	0.05726	0.07527	0	0.04938	0	0.04696	0.09628	0.05012	0	0.04383	0	0	0	0	0	0	0	0	0	0	0	0	0	0.06241	0.08111	0	0.05095	0	0	0.0335	0	0.07283	0	0	0	0	0	0	0	0	0	0	0.0484975	0.0146842	0	0.0293685
nR	Large-N-glycans	15.8916	18.9556	13.1198	10.0195	12.2782	10.3023	10.1371	12.2765	14.3433	7.73433	7.32857	6.68992	21.6294	8.56399	48.7058	16.014	15.8011	5.03404	15.5415	9.33806	9.68011	29.0626	12.2366	10.185	10.6738	15.566	13.7745	9.35328	9.52807	10.6852	11.0956	28.5886	11.675	8.8763	11.1894	20.4011	3.96158	7.8611	7.54516	12.7349	13.6022	4.62838	5.52886	8.07425	14.4966	12.7056	13.3563	12.055
nB	Biantennary-size	24.2244	29.1208	21.6746	27.8867	46.6536	22.7603	34.7368	41.7976	28.8925	24.329	28.7692	27.4586	38.3676	36.7406	26.9468	36.231	29.1671	42.7008	58.5186	54.0612	30.3753	39.7273	42.4973	51.0134	52.5043	29.7884	37.4979	41.9537	43.0483	47.9692	39.7128	15.7998	24.8289	28.7639	50.5546	29.8532	38.561	31.4904	30.7774	53.0692	23.4379	34.273	25.7282	51.0605	25.7266	36.8104	39.0022	34.6187
nN	Monoantennary	40.8119	34.8	41.314	34.9559	42.7807	44.1729	40.0201	46.783	41.8662	58.8578	51.8565	46.3177	41.3678	50.0496	34.3748	37.4494	46.4955	45.714	36.6796	54.7599	51.4342	26.9738	45.6891	51.595	45.6524	42.9922	36.5559	47.6863	36.2738	43.6728	37.3045	44.221	38.3636	43.6257	48.8912	50.9831	56.3982	48.2609	42.9565	48.4222	50.7148	48.9709	50.6765	48.7678	37.9705	45.1657	46.3104	44.021
nG	Glucosylated	0.51835	0.62078	0.54372	0.40249	0.34747	0.36435	0.45563	0.25613	0.2796	0.30526	0.52921	0.41056	0.22453	0.25718	0	0.93791	0.48636	0	1.06171	0	0.59073	0	0	0	0.36218	0.34923	0.27593	0.29485	0.50947	0.34004	0.38699	0.4877	0.33309	0.4723	0	0.40312	0.15956	0.54176	0.59695	0.61292	0.37019	0.20756	0.27977	0	0.521335	0.337256	0.312427	0.362085
nJ	Small high-mannose type	24.3989	24.7144	26.5343	24.3124	29.4543	30.6222	22.4103	31.2315	30.8172	34.0476	22.2196	21.5342	36.9856	31.9114	35.7009	19.9769	24.3997	43.8808	18.348	22.9927	22.5309	35.505	33.2892	30.6535	18.1251	26.9147	24.6719	34.6808	29.5065	26.8353	32.3109	28.5314	32.1291	19.7377	35.5059	26.586	14.7596	21.3575	23.4116	33.8607	17.4441	30.0675	20.0564	34.1132	24.99	27.7279	27.222	28.2339
nF	Fucosylation	44.6522	49.9704	46.3334	38.1709	57.8576	64.4423	48.3353	48.1041	56.3827	56.5151	58.2817	55.4781	57.1205	53.0101	17.4352	44.2781	29.6325	69.0688	53.2368	50.9626	59.6958	53.7232	61.6763	65.0349	42.9365	53.0074	54.1046	47.5113	53.2192	57.3451	34.5105	24.75	60.6012	48.2761	62.1713	48.9433	33.0006	52.9475	49.0293	61.8138	51.1683	48.2116	55.0808	55.3535	44.7817	51.3563	51.1232	51.5895
nFM	Fucosylation in high-mannose type	0.95896	0.73623	1.02248	0.67005	0.82555	1.1963	0.98567	1.26869	1.2983	1.31917	1.23084	1.16797	0.89029	1.44165	0.58328	1.18221	0.25063	0.79855	1.26026	0.44267	1.58634	1.21213	0.58281	1.19707	1.17134	1.21091	0.90547	0.64283	0.64566	1.71089	0.37624	0.74421	1.32382	1.88555	0.60946	0.53251	0.72117	1.11775	0.66953	0.7705	0.76858	0.89429	1.01517	0.80727	0.84693	0.981088	0.850109	1.11207
nFL	Fucosylation in paucimannose	50.264	52.8339	54.5599	48.9283	80.938	79.6435	76.7949	74.6325	67.9453	77.4165	80.6501	76.9556	79.664	78.072	28.625	70.751	51.3975	69.7163	74.9987	83.8554	78.6014	77.3212	84.1256	79.9252	72.5205	70.7866	73.9716	54.4529	71.0188	81.6926	44.2213	49.4307	72.5997	69.4853	76.3714	69.7697	71.0756	77.4605	73.3699	73.1811	76.7084	72.2938	77.4058	70.1503	51.6465	71.7499	71.8552	71.6446
nFH	Fucosylation in hybrid-type	53.2305	53.1639	48.7049	53.5306	73.8068	65.853	62.4104	65.0081	73.6003	76.3901	71.8797	77.2662	70.6154	68.85	19.1379	69.063	47.8723	62.0426	58.7157	64.1288	72.2827	78.1576	76.9597	59.935	64.6907	67.3213	68.8903	55.9322	64.2652	72.2063	29.3556	34.9946	72.2537	69.5631	63.342	72.4563	75.5199	68.1981	69.1904	66.5512	76.274	72.6103	70.8884	64.6742	52.1575	65.3288	65.4	65.2577
nFC	Fucosylation in complex-type	85.9599	89.5401	81.7928	85.0328	82.4343	89.2858	87.5449	74.1322	91.3046	82.2422	89.2376	89.3267	84.6631	82.0771	24.6632	87.8226	61.1231	86.6633	83.2139	69.4347	93.099	83.4995	87.9939	78.5244	78.4096	88.126	83.0663	73.2142	83.9145	81.6801	65.6842	31.5238	85.2944	86.7601	79.2473	90.719	84.4019	83.9783	88.8648	84.6102	84.2807	87.9443	91.3842	86.0579	85.5814	80.6862	80.8763	80.4961
nE	Complex fucosylation	5.91432	6.90579	5.87413	3.70328	3.5187	7.2585	3.76169	4.27148	9.65426	3.57213	2.14748	6.05276	3.68952	3.28736	0.32028	4.2717	2.14231	0.6143	5.03606	0.69849	6.32051	12.1178	6.20515	4.52795	1.76443	5.26929	9.01286	1.07612	5.1585	3.80797	1.55813	0.30297	8.77132	7.72913	3.61995	8.985	1.72128	1.71262	3.1397	5.34202	2.38935	3.25301	1.04911	2.00851	5.59938	4.17849	3.77375	4.58323
nEH	Complex fucosylation in hybrid-type	6.78892	3.53008	6.89425	10.0758	8.80207	10.8869	10.7826	13.0455	13.9589	16.8122	8.0365	15.7357	7.60615	7.72938	0.05338	9.65681	8.14368	0	5.72583	4.46029	6.75754	27.0299	13.7735	4.84177	6.60722	8.07561	14.2826	4.85033	14.5016	10.9405	4.07585	0.90231	17.1743	14.2562	3.38651	11.8887	15.131	4.96055	13.1141	6.96589	7.38828	17.4353	4.50064	6.27765	6.82227	9.51384	8.57456	10.4531
nEC	Complex fucosylation in complex-type	15.0111	14.9036	12.7641	9.66402	6.78833	13.0728	10.7813	11.5593	20.689	5.53168	5.88498	12.061	9.71799	10.1078	0.6353	14.9605	6.75476	0.91446	10.886	2.71383	13.7058	32.5827	15.0939	7.15259	4.81103	15.0202	21.3107	1.6317	9.46003	12.06	3.25512	0.41429	14.6175	20.6017	6.6458	28.0768	8.63598	5.23458	8.71144	8.9554	10.7742	6.92607	2.29519	4.24681	13.0857	10.132	9.79511	10.4688
nT	Terminal HexNAc	17.4139	16.9973	21.2169	15.126	8.52281	27.3153	11.2058	7.69828	17.7998	16.5751	14.0672	19.8393	7.83275	9.59918	9.13721	9.22823	10.7618	25.6566	8.10798	3.57929	15.8015	6.50516	10.7677	16.4492	6.66631	13.5557	13.7249	13.3006	11.5872	6.48049	11.956	30.0972	25.6679	16.4442	13.7568	10.3148	5.24487	13.0131	12.2271	11.4499	9.07812	14.2467	18.7205	10.7978	17.6885	13.1195	11.7422	14.4968
nTH	Terminal HexNAc in hybrid-type	3.98456	2.33995	1.8781	1.49372	2.65201	4.98837	3.00971	3.91231	2.33257	6.6378	6.39835	1.30298	5.08124	4.86139	2.42293	2.20229	1.82505	2.84027	3.16359	4.67269	3.8029	1.99167	3.6238	4.56292	2.74477	2.06553	2.31515	2.93975	4.12327	3.8306	2.93034	2.40808	1.72622	2.95384	9.09364	2.3829	7.05278	4.48449	3.98661	5.25403	4.02431	2.69269	4.4024	2.84639	2.42408	3.66357	3.86642	3.46071
nTC	Terminal HexNAc in complex-type	45.9478	37.1501	49.1719	44.9004	20.3748	52.4753	36.522	27.409	42.1719	46.0716	46.0345	48.6839	22.6913	34.6801	18.0565	35.3736	39.4078	37.9789	18.1191	17.5944	35.4772	20.0871	29.6317	27.3041	23.7428	41.4737	35.1629	33.7737	26.5346	24.4016	33.2769	47.214	49.322	47.9993	25.7878	34.844	41.3143	46.4942	41.7351	20.4196	48.5518	43.4165	50.8961	28.4258	44.2925	35.0233	33.0458	37.0008
nQ	Terminal HexNAc (bisecting-size)	12.4355	15.117	10.5167	7.67013	3.52513	7.25433	6.29208	5.53301	10.1213	3.68785	3.47665	3.53903	15.6813	2.86057	33.0965	6.20957	9.03081	1.7841	5.56985	2.34528	3.7667	15.3558	3.56185	2.68431	3.51126	9.72593	8.32609	4.06004	4.91998	4.67789	5.18284	25.1828	8.73284	4.61048	3.86666	6.88102	2.61671	4.43124	4.35827	4.8605	7.00474	2.54936	2.77923	3.78622	11.4348	6.686	6.32694	7.04507
nX	Terminal Hex in complex-type	0.77651	0.90329	0.80771	0.59487	0.21019	1.10769	0.47877	0.30312	0.64453	0.16753	0.2112	0.34867	1.49682	0.64143	0.78158	0	1.16779	0.65716	0	0.86153	0	0	0.36986	0.46751	0.43269	0.43384	0.71911	0.27759	0.51526	0.47101	0.23797	0.99727	1.14204	0.23838	0.2608	0.27288	0.54665	0.30409	0.28951	0.41186	0.1972	0.4401	0.11412	0.24131	0.770595	0.461476	0.369197	0.553755
[truncated: 12 more columns]
