# Supplementary material for: N-Glycomic Profiling of Microsatellite Unstable Colorectal Cancer
Source: Preprints.org preprint supplement (doi:10.20944/preprints202306.0975.v1), 2023-06-14
Supplement: Supplementary file 2 [file Supplementary Table S1 Ukkola.xlsx]

## Sheet: Acidic-Peak table
Supplementary Table S1. MS data of acidic N-glycans.
			AH33-31-11-2b	AH34-1-11-2	AH34-6-11-2	AH34-14-11-2	AH33-31-1-2b	AH33-31-2-2b	AH33-31-3-2b	AH33-31-4-2b	AH33-31-5-2b	AH33-31-6-2b	AH33-31-7-2b	AH33-31-8-2b	AH33-31-9-2b	AH33-31-10-2b	AH34-1-1-2	AH34-1-2-2	AH34-1-3-2	AH34-1-4-2	AH34-1-5-2	AH34-1-6-2	AH34-1-7-2	AH34-1-8-2	AH34-1-9-2	AH34-1-10-2	AH34-6-1-2	AH34-6-2-2	AH34-6-3-2	AH34-6-4-2	AH34-6-5-2	AH34-6-6-2	AH34-6-7-2	AH34-6-8-2	AH34-6-9-2	AH34-6-10-2	AH34-14-1-2	AH34-14-2-2	AH34-14-3-2	AH34-14-4-2	AH34-14-5-2	AH34-14-6-2	AH34-14-7-2	AH34-14-8-2	AH34-14-9-2	AH34-14-10-2
Acidic N-glycans			Normal colon				MSI CRC Stage IV BRAFwt										MSI CRC Stage II BRAFwt										MSI CRC Stage IV BRAFmut										MSI CRC Stage II BRAFmut										AVERAGES
			A	B	C	D	500	501	502	503	504	505	506	507	508	509	600	601	602	603	604	605	606	607	608	609	700	701	702	703	704	705	706	707	708	709	800	801	802	803	804	805	806	807	808	809	Normal	MSI CRC	MSI CRC St II
Composition	Short	m\z	%	%	%	%	%	%	%	%	%	%	%	%	%	%	%	%	%	%	%	%	%	%	%	%	%	%	%	%	%	%	%	%	%	%	%	%	%	%	%	%	%	%	%	%	%	%	%
Hex4HexNAc3SP	H4N3P1	1354.41	0	0	0	0	0	0	0	0	0	0	0	0	0	0	0	0	1.90813	0	0	0	0	0	0	0	0	0	0	0	0	0	0	0	0	0	0	0	0	0	0	0	0	0	0	0	0	0.0477032	0.0954063
Hex4HexNAc3dHexSP	H4N3F1P1	1500.47	0	0	0	0	0	0	0	0	0	0	0	0	0	0	0	1.16488	0	0	0	0	0	0	0	0	0	0	0.37887	0	0	0	0	0	0	0	0	0	0	0	0	0	0	0	0	0	0	0.0385937	0.058244
Hex3HexNAc4dHexSP	H3N4F1P1	1541.49	0	0	0	0	0	0	0	0	0	0	0	0	0	0	0	0	0	0	0	0	0	0	0	0	0	0	0	0	0	0	0	0	0	0.384828	0	0	0	0	0	0	0	0	0	0	0	0.00962071	0
NeuAcHex4HexNAc3	S1H4N3	1565.55	0	0	0	0	0.429734	0	0	0	0	0.288083	0	0	0	0	0	0	0.615188	0	0	0	0	0	0	0	0	0	0	1.9971	0	0	0	0.277975	0	0.280604	0	0	0	0	0	0	0	0	0	0	0	0.0972171	0.0307594
Hex4HexNAc3dHex2SP	H4N3F2P1	1646.52	0	0	0	0	0	0	0	0	0	0	0	0	0	0	0	0	0	0	0	0	0	0	0	0	0	0	0.963411	0	0.685981	0	0	0	0	0	0	0	0	0	0	0	0	0	0	0	0	0.0412348	0
NeuAcHex4HexNAc3dHex	S1H4N3F1	1711.61	0.799846	0	0.553741	0	3.11955	0	1.63427	1.78581	0	3.04887	2.27868	1.80066	1.95589	5.358	0	1.31905	0.886288	0	0	3.5266	3.51838	1.98549	2.85116	0.585484	1.34389	1.0015	0.497943	1.24203	0.763431	2.23373	0	0.228657	1.21995	1.51526	0	1.20409	1.9765	1.86219	1.20546	0	7.88395	0	1.34872	0	0.338397	1.52954	1.50767
Hex5HexNAc4SP	H5N4P1	1719.54	0	0	0	0	0	0	0	0	0	0	0	0	0	0	10.6922	0	2.51289	0	0	0	0	0	0	0	0	0	0	0	0	0	5.44853	0.260041	0	0	0	0	0	0	0	0	0	0	0	0	0	0.47284	0.660252
NeuAcHex5HexNAc3	S1H5N3	1727.6	0	0	0.324041	0	0	0	0	0	0	0	0	0	0	0	0	0	0	0	0	0	0	0	0	0	0	0	0	0	0	0	0	0	0	0	0	0	0	0	0	0	0	0	0	0	0.0810103	0	0
Hex4HexNAc5SP	H4N5P1	1760.57	0	0	0	0	0	0	0	0	0	0	0	0	0	0	0	0	0.646469	0	0	0	0	0	0	0	0	0	0	0	0	0	0	0.412479	0	0	0	0	0	0	0	0	0	0	0	0	0	0.0264737	0.0323234
NeuAcHex4HexNAc4	S1H4N4	1768.63	0	0	0	0	0	0	0	0	0	0.344099	0	0	0	0	0	0	0.333661	0	0	0	0	0	0	0	0	0	0	0.50885	0	0	0	0.201756	0	0	0	0	0	0	0	0	0	0	0	0	0	0.0347091	0.0166831
Hex4HexNAc4dHex2SP	H4N4F2P1	1849.6	0	0	0	0	0	0	0	0	0	0	0	0	0	0	0	0	0	0	0	0	0	0	0.684279	0	0	0	0	0	0	0	0	0	0	0.801726	0	0	0	0	0	0	0	0	0	0	0	0.0371501	0.0342139
NeuAcHex4HexNAc3dHex2	S1H4N3F2	1857.66	0	0	0	0	0	0	0	0	0	0	0	0	0	0	0	0	0	0	0	0	0	0	0	0	0	0	0	0	0.431504	0	0	0	0.493364	0	0	0	0	0	0	0	0	0	0	0	0	0.0231217	0
Hex5HexNAc4dHexSP	H5N4F1P1	1865.6	0	0.458725	0.582454	0	0	0	0	0	0	0	0	0	0	0	0	1.69593	0	0	0	0	0	0	0.693783	0	0	0	0	0	0.381715	0	0	0	0	0.440949	0	0	0	0	0	0	0	0	0	0	0.260295	0.0803094	0.119486
NeuAcHex6HexNAc3	S1H6N3	1889.65	0	0	0	0	0	0	0	0	0	0	0	0	0	0	0	0	0	0	0	0	0	0	0	0	0	0	0	0	0	0	0	0.363161	0	0	0	0	0	0	0	0	0	0	0	0	0	0.00907903	0
NeuAcHex4HexNAc4dHex	S1H4N4F1	1914.68	0.799846	1.02043	1.48075	0	1.22554	0.340344	0.629877	0.798202	0.592935	1.94456	0.994129	0.875999	1.22975	1.47198	0	0	0.469211	0	0	0.612409	1.06919	0	0.836341	0.872486	0.55447	0	0.35722	0.536207	0.580871	0.990766	0	0.269008	1.02261	0.777674	0	1.07953	0	0	1.20546	0	0	0	0	0	0.825255	0.533419	0.307231
Hex5HexNAc5SP	H5N5P1	1922.62	0	0	0	0	0	0	0	0	0	0	0	0	0	0	1.56873	0	0.938423	0	0	0	0	0	0	0	0	0	0	0	0	0	1.23031	1.46161	0	0	0	0	0	0	0	0	0	0	0	0	0	0.129977	0.125358
NeuAcHex5HexNAc4	S1H5N4	1930.68	9.92401	11.0375	13.3185	9.74723	10.7911	16.1957	9.02256	17.831	6.65752	16.1406	12.5997	8.33821	12.7192	12.4677	7.80238	9.40469	13.3673	17.2145	16.1833	23.6234	13.2281	9.03677	18.2664	19.1488	15.5346	14.2364	13.2713	15.4625	9.54288	8.61066	6.87058	5.92267	13.9487	9.99752	2.08272	8.26255	13.2479	12.4724	11.8883	11.9276	16.9771	15.364	16.2925	4.50134	11.0068	12.4113	13.0146
NeuAcHex4HexNAc5	S1H4N5	1971.71	0	0	0.258413	0	0	0	0	0	0	0	0	0	0	0	0	0	0.70903	0	0	0	0	0	0	0	0	0.387677	0	0.497907	0	0	0	2.21932	0	0	0	0	0	0	0	0	0	0	0	0	0.0646031	0.0953483	0.0354515
Hex4HexNAc4dHex3SP	H4N4F3P1	1995.66	0	0	0	0	0	0	0	0	0	0	0	0	0	0	0	0	0	0	0	0	0	0	0	0	0	0	0	0	0	0	0	0	0	0.440949	0	0	0	0	0	0	0	0	0	0	0	0.0110237	0
Hex5HexNAc4dHex2SP	H5N4F2P1	2011.66	0	0.627237	0.676795	0	0	0	0	0	2.26772	0	0	0	0	0	0	0.719484	0	0	0	0	0.801893	0	0.874356	0	0	0	0	0	0.448101	0	0	0	0	0	0	0	0	0	0	0	0	0	0	0	0.326008	0.127789	0.119787
Hex4HexNAc5dHex2SP	H4N5F2P1	2052.68	0	0.70213	0.754729	0	0	0	0	0	0	0	0	0	0	0	0	0	0	0	0	0	0.385406	0	0	0	0	0	0	0	0	0	0	0	0	0.505087	0	0	0	0	0	0	0	0	0	0	0.364215	0.0222623	0.0192703
Hex5HexNAc5dHexSP	H5N5F1P1	2068.68	0	0	0.401975	0	0	0	0	0	0.447302	0	0	0	0	0	0	0	0	0	0	0	0	0	0	0	0	0.333833	0	0	0	0	0	0	0	0	0	0	0	0	0	0	0	0	0	0	0.100494	0.0195284	0
NeuAcHex4HexNAc4dHexSP2	S1H4N4F1P2	2074.6	0	0	0	0	0	0	0	0	0	0	0	0	0	0	0	0	0	0	0	0	0	0	0	0	0	0	0	0	0	0	0	0	0	0	0	0	0	0	0	0	0	0	0	0	0	0	0
NeuAcHex5HexNAc4dHex	S1H5N4F1	2076.74	32.5567	33.1031	27.8922	55.2884	27.0573	26.5703	36.7967	31.6981	34.099	25.0072	27.534	41.4639	36.4709	27.7321	14.3663	30.835	25.1914	32.495	31.3807	18.2417	25.1819	23.7331	20.975	33.7055	27.5262	27.2989	27.1054	26.5806	31.9147	16.753	9.25132	18.0908	28.0769	24.3163	2.81449	39.8595	24.4658	15.5905	51.2942	25.2751	19.7824	44.4102	55.5672	24.7574	37.2101	27.7817	27.9961
Hex6HexNAc5SP	H6N5P1	2084.67	0	0	0	0	0	0	0	0	0	0	0	0	0	0	3.71542	0	2.66929	0	0	0	0	0	0	0	0	0	0	0	0	0	5.65625	0.65907	0	0	0	0	0	0	0	0	0	0	0	0	0	0.317501	0.319236
NeuAcHex4HexNAc5dHex	S1H4N5F1	2117.76	0	0.674045	0.857273	0	0	0.492912	0.331962	0	0	0.256073	0	0.616444	0	0	0	0.58244	0.328201	0.565523	0	0	0	0.705128	0	0.470683	0	0	0.422169	0.333762	0.586403	0.702543	0	0.358678	1.21995	1.26673	0	0	0	0	0	0	0	0	0	0	0.38283	0.23099	0.132599
Hex5HexNAc6SP	H5N6P1	2125.7	0	0	0	0	0	0	0	0	0	0	0	0	0	0	0	0	2.27307	0	0	0	0	0	0	0	0	0	0	0	0	0	0.910752	4.06203	0	0	0	0	0	0	0	0	0	0	0	0	0	0.181146	0.113653
NeuAcHex5HexNAc5	S1H5N5	2133.76	0	0	0.418382	0	0	0	0	0	0	0	0	0	0	0	1.52745	0	0.636042	0	0	0	0	0	0	0	0	0	0	0.481492	0	0	0	6.13787	0	0	0	0	0	0	0	0	0	0	0	0	0.104596	0.219571	0.108175
NeuAc3Hex2HexNAc2dHex3SP	S3H2N2F3P1	2138.68	0	0	0	0	0	0	0	0	0	0	0	0	0	0	0	0	0	0	0	0	0	0	0	0	0	0	0	0	0	0	0	0	0	0	0	0	0	0	0	0	0	0	0	0	0	0	0
NeuAcHex5HexNAc4dHexSP	S1H5N4F1P1	2156.69	0	0	0	0	0	0	0	0	0	0	0	0	0	0	0	0	0	0	0	0	0	0	0	0	0	0	0	0	0.309798	0	0	0	0	0	0	0	0	0	0	0	0	0	0	0	0	0.00774495	0
Hex5HexNAc4dHex3SP	H5N4F3P1	2157.71	1.03684	1.66639	1.40691	0	0	0	0	0	2.87106	0	0	0	0	0	0	0	0	0	0	0	3.03352	1.74426	1.25451	0	0	0.516903	0	0	1.07616	1.02679	0	0	0	0.481035	0	0	0	0	0	0	0	0	0	0	1.02753	0.300106	0.301615
NeuAcHex3HexNAc6dHex	S1H3N6F1	2158.79	0	0	0	0	0	0	0	0	0	0	0	0	0	0	0	0	0	0	0	0	0	0	0	0	0	0	0	0	0	0	0	0	0	0.24377	0	0	0	0	0	0	0	0	0	0	0	0.00609426	0
NeuAcHex4HexNAc6	S1H4N6	2174.79	0	0	0.315838	0	0	0	0	0	0	0	0	0	0	0	0	0	0	0	0	0	0	0	0	0	0	0	0	0.257161	0	0	0	0.551467	0	0	0	0	0	0	0	0	0	0	0	0	0.0789594	0.0202157	0
Hex4HexNAc5dHex3SP	H4N5F3P1	2198.74	1.17014	2.26554	2.95329	0	0	0.46944	0	0	0	0	0	0	0	0	0	0	0	0	0	0	0.590541	0	0	0	0	0	0	0	0.39278	0	0	0	0	1.05026	0	0	0	0	0	0	0	0	0	0	1.59724	0.0625755	0.0295271
Hex5HexNAc5dHex2SP	H5N5F2P1	2214.74	0.666538	3.18299	1.92784	0	0	0	0	0	0.468107	0	0	0	0	0	0	0	0	0	0	0	0.242433	0	0	0	0	0	0.432994	0	0.365119	0	0	0	0	0	0	0	0	0	0	0	0	0	0	0	1.44434	0.0377163	0.0121216
NeuAc2Hex5HexNAc4	S2H5N4	2221.78	21.1959	11.1966	11.697	18.6822	25.7841	33.6354	19.8666	21.2268	19.0259	29.1524	28.4276	15.1191	23.2833	24.0816	15.9763	16.2055	7.96617	25.2902	19.4442	21.9615	10.7043	19.4467	18.9127	24.1082	21.1075	20.9453	18.6837	24.2223	12.6077	25.0033	26.252	4.83767	9.80449	11.0638	71.8259	29.521	23.1838	42.2242	18.0403	43.3795	38.2589	23.3135	12.3003	29.5656	15.6929	23.144	25.5814
NeuAcHex5HexNAc4dHex2	S1H5N4F2	2222.8	5.72998	2.6008	2.51157	0	7.58414	2.66192	4.37413	6.12831	2.85822	4.41793	3.40914	3.40515	2.61793	7.84545	2.91404	4.81928	1.95897	4.54627	2.35677	6.619	5.41782	7.55935	7.68471	4.52178	6.22371	1.70405	5.19248	1.91808	3.07165	0.982858	2.95909	1.20744	3.72021	4.69267	0	4.49622	18.6429	8.92963	4.23969	2.50587	1.77437	2.45614	1.50123	11.7294	2.71059	4.5412	5.23367
Hex4HexNAc6dHex2SP	H4N6F2P1	2255.76	0	0	0	0	0	0	0	0	0.582533	0	0	0	0	0	0	0	0	0	0	0	0	0	0	0	0	0	0.519593	0	0	0	0	0	0	1.32285	0	0	0	0	0	0	0	0	0	0	0	0.0606243	0
NeuAc2Hex4HexNAc5	S2H4N5	2262.8	0	0	0	0	0	0	0	0	0	0	0	0	0	0	0	0	0	0	0	0	0	0	0	0	0	0	0	0.31844	0	0	0	0	0	0	0	0	0	0	0	0	0	0	0	0	0	0.007961	0
NeuAcHex4HexNAc5dHex2	S1H4N5F2	2263.82	0	0	0	0	0	0	0	0	0	0	0	0	0	0	0	0	0	0	0	0	0	0	0	0	0	0	0	0	0	0	1.23031	0	1.21995	0	0	0	3.57906	0	0	0	0	0	0	0	0	0.150733	0.178953
Hex5HexNAc6dHexSP	H5N6F1P1	2271.76	0	0	0	0	0	0	0	0	0.291266	0	0	0	0	0	0	0	0	0	0	0	0	0	0	0	0	0	0	0	0	0	0	0	0	0	0	0	0	0	0	0	0	0	0	0	0	0.00728166	0
NeuAcHex5HexNAc5dHex	S1H5N5F1	2279.82	1.37751	2.10639	2.11242	0	0.748056	0.668952	1.20868	0.649385	0.312071	1.0403	0.815409	1.00578	0.538749	0.69183	0	2.03854	1.06355	0.96139	1.12236	1.0145	1.10649	1.13192	1.24501	0.596964	0.751824	1.01227	0.920112	1.48825	0.713642	1.47714	1.3102	0.959463	2.05419	1.78785	0	0	0	0.996057	1.33016	0	0	0	0	0	1.39908	0.819027	0.630347
NeuAcHex6HexNAc4dHexAc	S1H6N4F1A1	2280.8	0	0	0.423135	0	0	0	0	0	0	0	0	0	0	0	0	0	0	0	0	0	0	0	0	0	0	0	0	0	0	0	0	0	0	0	0	0	0	0	0	0	0	0	0	0	0.105784	0	0
Hex6HexNAc6SP	H6N6P1	2287.75	0	0	0	0	0	0	0	0	0	0	0	0	0	0	6.93545	0	3.06551	0	0	0	0	0	0	0	0	0	0	0	0	0	2.189	7.4874	0	0	0	0	0	0	0	0	0	0	0	0	0	0.491934	0.500048
NeuAcHex6HexNAc5	S1H6N5	2295.81	0.488795	0	0.467604	0	0	0	0.280891	0.487039	0	0.360103	0	0	0.374782	0	1.4036	0.59957	1.33465	0.72387	0.864524	0.90822	0.385406	0	0.63676	0.344402	0	0.829199	0.649491	0.705824	0.49789	0	1.45401	1.78442	0.466453	0.681467	0	0	0	0	0	0	0	0	0	0	0.2391	0.394314	0.36005
Hex3HexNAc7dHex2SP	H3N7F2P1	2296.79	0	0	0.236054	0	0	0	0	0	0	0	0	0	0	0	0	0	0.609908	0	0	0	0	0	0	0	0	0	0	0	0	0	0	0	0	0	0	0	0	0	0	0	0	0	0	0	0.0590134	0.0152477	0.0304954
NeuAcHex5HexNAc4dHex2SP	S1H5N4F2P1	2302.75	0	0	0	0	0	0	0	0	0	0	0	0	0	0	0	0	0	0	0	0	0	0	0	0	0	0	0	0	0	0	0	0	0	0.49707	0	0	0	0	0	0	0	0	0	0	0	0.0124267	0
Hex5HexNAc4dHex4SP	H5N4F4P1	2303.77	0	0	0	0	0	0	0	0	0	0	0	0	0	0	0	0	0	0	0	0	0	1.31748	0	0	0	0	0	0	0	0	0	0	0	0	0	0	0	0	0	0	0	0	0	0	0	0.0329369	0.0658738
NeuAcHex3HexNAc6dHex2	S1H3N6F2	2304.85	0	0	0	0	0	0	0	0	0	0	0	0	0	0	0	0	0	0	0	0	0	0	0	0	0	0	0	0	0	0	0	0	0	0	0	0	1.28205	0	0	0	0	0	0	0	0	0.0320513	0.0641026
NeuAcHex4HexNAc6dHex	S1H4N6F1	2320.84	0	0	0	0	0	0	0	0	0	0	0	0	0	0	0	0	0	0	0	0	0	0	0	0	0	0	0	0	0	0	0	0	0.834234	0	0	0	0	0	0	0	0	0	0	0	0	0.0208558	0
NeuAcHex6HexNAc3dHex3	S1H6N3F3	2327.83	0	0	0	0	0	0	0	0	0	0	0	0	0	0	0	0	0.604761	0	0	0	0	0	0	0	0	0	0	0	0	0	0	0	0	0	0	0	0	0	0	0	0	0	0	0	0	0.015119	0.0302381
NeuAcHex5HexNAc6	S1H5N6	2336.84	0	0	0	0	0	0	0	0	0	0	0	0	0	0	0	0	0.5422	0	0	0	0	0	0	0	0	0	0	0.268104	0	0	0	1.80645	0	0	0	0	0	0	0	0	0	0	0	0	0	0.0654189	0.02711
NeuAc2Hex3HexNAc4dHex2SP2	S2H3N4F2P2	2349.7	0	0	0	0	0	0	0	0	0	0	0	0	0	0	0	0	0	0	0	0	0	0	0	0	0	0	0	0	0	0	0	0	1.38142	0	0	0	0	0	0	0	0	0	0	0	0	0.0345355	0
NeuAc3Hex4HexNac4	S3H4N4	2350.82	0	0	0	0	0	0	0	0	0	0	0	0	0	0	0	0	0	0	0	0	0	0	0	0	0.121145	0	0	0	0	0	0	0.150958	0	0.070993	0	0	0	0	0	0	0	0	0	0	0	0.00857742	0
Hex5HexNAc5dHex3SP	H5N5F3P1	2360.79	0.740598	2.09703	2.36673	0	0	0	0	0	0.957018	0	0	0	0	0	0	0	0	0	0	0	0.578109	0.909244	0.864852	0	0	0	0	0	0	0	0	0	0	0.505087	0	0	0	0	0	0	0	0	0	0	1.30109	0.0953578	0.11761
Hex11HexNAc2SP2	H11N2P2	2365.66	0	0	0	0	0	0	0	0	0	0	0	0	0	0	0	0	0	0	0	0	0	0	0.41817	0	0	0	0	0	0	0	0	0	0	0	0	0	0	0	0	0	0	0	0	0	0	0.0104543	0.0209085
NeuAc2Hex5HexNAc4dHex	S2H5N4F1	2367.83	10.4128	6.47832	7.21914	9.09741	8.02171	8.87242	11.857	8.18496	11.2034	8.20235	11.1365	15.4111	10.4353	6.97718	6.44006	8.0685	3.51387	7.36311	14.4997	6.75368	5.23406	11.6903	4.44781	6.40589	11.5311	11.5226	8.06451	10.1223	11.2855	17.5996	13.118	4.06651	6.1536	7.21553	16.0989	6.43565	6.35684	9.31097	5.81944	10.9336	5.41719	7.87307	6.04225	24.4505	8.30192	9.35341	8.65777
NeuAcHex5HexNAc4dHex3	S1H5N4F3	2368.85	0.985729	0.317957	0.446191	4.85623	3.39071	1.12144	1.48607	0.733762	1.14923	1.19582	1.99371	1.51282	0	1.4597	2.02823	2.19749	0	0.322417	0	0.480198	0.80388	1.45286	1.41029	0.952906	2.04716	2.16174	1.03885	1.01985	2.62357	2.97663	1.15218	1.42966	2.27117	1.94128	0	6.56719	3.71382	2.59454	1.52688	4.06146	2.45641	3.02881	1.55297	0.307686	1.65153	1.70408	1.7729
Hex6HexNAc5dHex2SP	H6N5F2P1	2376.79	0	0	0.272421	0	0	0	0	0	1.24828	0	0	0	0	0	0	0	0	0	0	0	0	0	0	0	0	0	0	0	0.326394	0	0	0	0	0	0	0	0	0	0	0	0	0	0	0	0.0681051	0.039367	0
Hex4HexNAc6dHex3SP	H4N6F3P1	2401.82	0	0	0	0	0	0	0	0	0	0	0	0	0	0	0	0	0	0	0	0	0	0	0	0	0	0	0	0	0	0	0	0	0	1.13043	0	0	0	0	0	0	0	0	0	0	0	0.0282608	0
NeuAc2Hex4HexNAc5dHex	S2H4N5F1	2408.86	0	0	0	0	0	0	0	0	0	0	0	0	0	0	0	0	0	0	0	0	0	0	0	0	0	0	0	0	0	0	0	0	0	0	0	0	1.28205	0	0	0	0	0	0	0	0	0.0320513	0.0641026
NeuAcHex4HexNAc5dHex3	S1H4N5F3	2409.88	0	0	0	0	0	0	0	0	0	0	0	0	0	0	0	0	0	0	0	0	0	0	0	0	0	0	0	0	0	0	0	0	0.780412	0	0	0	0.987229	0	0	0	0	0	0	0	0	0.044191	0.0493614
Hex5HexNAc6dHex2SP	H5N6F2P1	2417.82	0	0.524257	0.545538	0	0	0	0	0	0.520119	0	0	0	0	0	0	0	0	0	0	0	0.273514	0	0	0	0	0.387677	0.811864	0	0.514486	0	1.90139	0	0	0	0	0	0	0	0	0	0	0	0	0	0.267449	0.110226	0.0136757
NeuAc2Hex5HexNAc5	S2H5N5	2424.85	0	0	0	0	0	0	0	0	0	0	0	0	0	0	0	0	0	0	0	0	0	0	0	0	0	0	0	0.459606	0	0	0	1.50196	0	0	0	0	0	0	0	0	0	0	0	0	0	0.0490392	0
NeuAcHex5HexNAc5dHex2	S1H5N5F2	2425.87	0	0	0.410179	0	0	0	0.995886	0	0	0	0	0	0	0	0	0	0	0	0	0	0	0	0.427674	0	0	0	0	0	0.260009	0	0	1.38539	1.64156	0	0	0	0	0	0	0	0	0	0	0	0.102545	0.117763	0.0213837
Hex6HexNAc6dHexSP	H6N6F1P1	2433.81	0	0	0.406077	0	0	0	0	0	0.977823	0	0	0	0	0	0	0	0	0	0	0	0	0	0	0	0	0	0	0	0	0	0	0	0	0	0	0	0	0	0	0	0	0	0	0	0.101519	0.0244456	0
NeuAcHex5HexNAc5dHexSP2	S1H5N5F1P2	2439.73	0	0	0	0	0	0	0	0	0	0	0	0	0	0	0	0.650962	0	0	0	0	0	0	0	0	0	0	0	0	0	0	0	0	0	0	0	0	0	0	0	0	0	0	0	0	0	0.0162741	0.0325481
NeuAcHex6HexNAc5dHex	S1H6N5F1	2441.87	2.93277	3.87576	3.06403	2.3285	2.29192	1.6313	3.34516	2.59754	2.22611	2.61675	2.40155	2.95244	3.38475	2.64956	0	4.07708	2.5963	3.25741	4.48946	3.70051	2.54865	2.05971	2.57555	2.98482	3.23284	2.87527	2.46807	2.71386	3.41331	3.02634	1.94933	1.73959	3.87515	3.64785	0	1.24561	1.28205	0	2.32778	0	2.66023	1.33766	4.04615	0	3.05027	2.40569	2.05945
NeuAcHex5HexNAc4dHex3SP	S1H5N4F3P1	2448.81	0	0	0	0	0	0	0	0	0	0	0	0	0	0	0	0	0	0	0	0	0	0	0	0	0	0	0	0	0.403844	0	0	0	0	0	0	0	0	0	0	0	0	0	0	0	0	0.0100961	0
Hex7HexNAc6SP	H7N6P1	2449.81	0	0	0	0	0	0	0	0	0	0	0	0	0	0	2.88977	0	5.01535	0	0	0	0	0	0	0	0	0	0	0	0	0	4.15431	0.735289	0	0.737588	0	0	0	0	0	0	0	0	0	0	0	0.338308	0.395256
NeuAcHex3HexNAc6dHex3	S1H3N6F3	2450.91	0	0	0	0	0	0	0	0	0	0	0	0	0	0	0	0	0	0	0	0	0	0	0	0	0	0	0	0	0	0	0	0	0	0	0	0	0	0	0	0	0	0	0	0	0	0	0
Hex4HexNAc7dHex2SP	H4N7F2P1	2458.84	0	0	0	0	0	0	0	0	0	0	0	0	0	0	0	0	0	0	0	0	0	0	0	0	0	0	0.487118	0	0	0	0	0	0	0.633363	0	0	0	0	0	0	0	0	0	0	0	0.028012	0
NeuAcHex5HexNAc6dHex	S1H5N6F1	2482.9	0	0	0	0	0	0	0	0	0	0	0	0	0	0	0	0	0	0	0	0	0	0	0	0	0	0	0	0	0	0	0	0	1.04055	0	0	0	0	0	0	0	0	0	0	0	0	0.0260137	0
NeuAc2Hex4HexNAc5dHexSP	S2H4N5F1P1	2488.82	0	0	0	0	0	0	0	0	0	0	0	0	0	0	0	0	0	0	0	0	0	0	0	0	0	0	0	0	0	0	0	0.399029	0	0	0	0	0	0	0	0	0	0	0	0	0	0.00997573	0
Hex6HexNAc7SP	H6N7P1	2490.83	0	0	0	0	0	0	0	0	0	0	0	0	0	0	1.69258	0	2.76313	0	0	0	0	0	0	0	0	0	0	0	0	0	1.24629	3.3342	0	0	0	0	0	0	0	0	0	0	0	0	0	0.225905	0.222786
NeuAcHex6HexNAc6	S1H6N6	2498.89	0	0	0	0	0	0	0	0	0	0	0	0	0	0	1.19719	0	0.594334	0	0	0	0	0	0	0	0	0	0	0	0	0	0	3.02634	0	0	0	0	0	0	0	0	0	0	0	0	0	0.120447	0.0895763
Hex5HexNAc5dHex4SP	H5N5F4P1	2506.85	0	0	0.377364	0	0	0	0	0	0	0	0	0	0	0	0	0	0	0	0	0	0	0	0	0	0	0	0	0	0	0	0	0	0	0.938019	0	0	0	0	0	0	0	0	0	0	0.0943411	0.0234505	0
Hex6HexNAc5dHex3SP	H6N5F3P1	2522.85	0	1.22639	0.742423	0	0	0	0	0	1.26909	0	0	0	0	0	0	0.736615	0	0	0.667352	0	1.49189	1.03914	0.608248	0	0	0.559978	0.487118	0	1.0345	0	0	0	0	0	0	0	0	0	0	0	0	0	0	0	0.492203	0.197348	0.227162
NeuAcHex4HexNAc7dHex	S1H4N7F1	2523.92	0	0	0	0	0	0	0	0	0	0	0	0	0	0	0	0.363339	0	0	0	0	0.12337	0	0	0	0	0	0	0	0.168828	0	0	0	0	0	0	0	0	0	0	0	0	0	0	0	0	0.0163884	0.0243354
Hex5HexNAc6dHex3SP	H5N6F3P1	2563.87	0	0.599151	0.602963	0	0	0	0	0	0.759373	0	0	0	0	0	0	0	0	0	0	0	0.951082	0	0	0	0	0	1.22321	0	0.575339	0	0	0	0	0.809743	0	0	0	0	0	0	0	0	0	0	0.300528	0.107969	0.0475541
NeuAc2Hex5HexNAc5dHex	S2H5N5F1	2570.91	0	0.524257	0.537334	0	0	0.64548	0.536246	0	0	0	0.51382	1.00578	0	0	0	0.59957	0	0	0	0	0.428919	0	0	0	0.488686	0	0	0.465078	0.320862	1.297	0	0	0.914966	0	0	0	0	0	0	0	0	0	0	0	0.265398	0.18041	0.0514245
NeuAcHex5HexNAc5dHex3	S1H5N5F3	2571.93	0	0	0	0	0.748056	0	0	0	0	0	0	0	0	0	0	0	0	0	0	0	0	0	0	0	0	0	0	0.201593	0.389393	0	0	0	1.87131	1.03423	0	0	0	1.08267	0	0	0	0	0	0	0	0.133181	0.0541335
NeuAcHex6HexNAc6SP	S1H6N6P1	2578.85	0	0	0	0	0	0	0	0	0	0	0	0	0	0	0	0	0	0	0	0	0	0	0	0	0	0	0	0	0	0	0	0.699422	0	0	0	0	0	0	0	0	0	0	0	0	0	0.0174855	0
Hex6HexNAc6dHex2SP	H6N6F2P1	2579.87	0.592478	1.48852	1.21003	0	0	0	0	0	1.06104	0	0	0	0	0	0	0	0	0	0	0	0	0	0	0	0	0	0.606191	0	0	0	0	0.127111	0	0	0	0	0	0	0	0	0	0	0	0	0.822756	0.0448586	0
NeuAc2Hex6HexNAc5	S2H6N5	2586.91	0.473983	0	0.496316	0	0.636643	0.35208	0	0.500568	0	0.376108	0.692539	0	0.796411	0.500473	1.52745	0	0.354515	0.644697	0	0	0.615406	0.9278	0	0	0.704835	1.08765	0.487118	0.738653	0.403844	0.954738	1.46999	0.600785	0.493364	0.473018	0	0	0	0	0	0	0	0	0	0	0.242575	0.383467	0.203493
NeuAcHex6HexNAc5dHex2	S1H6N5F2	2587.93	0	0	0.0495223	0	0	0.200113	0.859696	0.569969	0.322474	0.14255	0	0	0	0.375719	0	1.0107	0.255717	0	1.47121	0	0	0.601562	1.40657	0	0	0	0.4663	0.159935	0.328559	0.234611	0	0.261665	1.10119	0	0	0	0	0	0	0	0	0	0	0	0.0123806	0.244214	0.237288
Hex5HexNAc7dHex2SP	H5N7F2P1	2620.9	0	0	0	0	0	0	0	0	0	0	0	0	0	0	0	0	0	0	0	0	0	0	0	0	0	0	0.454644	0	0	0	0	0	0	0	0	0	0	0	0	0	0	0	0	0	0	0.0113661	0
NeuAcHex5HexNAc6dHex2	S1H5N6F2	2628.95	0	0	0	0	0	0	0	0	0	0	0	0	0	0	0	0	0	0	0	0	0	0	0	0	0	0	0	0	0	0	0	0.65907	1.12128	0	0	0	0	0	0	0	0	0	0	0	0	0.0445088	0
NeuAcHex6HexNAc6dHex	S1H6N6F1	2644.95	0	0	0	0	0	0	0	0	0	0	0	0	0	0	0	0	0	0	0	0	0	0	0	0	0	0	0	0	0	0	0	0	0.68174	0	0	0	0	0	0	0	0	0	0	0	0	0.0170435	0
Hex7HexNAc7SP	H7N7P1	2652.88	0	0	0	0	0	0	0	0	0	0	0	0	0	0	6.97674	0	3.42003	0	0	0	0	0	0	0	0	0	0	0	0	0	1.35814	8.46928	0	0.561208	0	0	0	0	0	0	0	0	0	0	0	0.519635	0.519838
NeuAc2Hex5HexNAc4dHex3	S2H5N4F3	2659.95	0	0	0	0	0	0	0	0	0	0	0	0	0	0	0	0	0	0	0	0	0	0	0	0	0	0	0	0	0.265541	0	0	0	0	0	0	0	0	0	0	0	0	0	0	0	0	0.00663853	0
NeuAcHex7HexNAc6	S1H7N6	2660.94	0	0	0	0	0	0	0	0	0	0	0	0	0	0	0	0	1.04705	0	0	0	0	0	0	0	0.328923	0.45229	0	0	0	0	0	0	0	0	0	0	0	0	0	0	0	0	0	0	0	0.0457066	0.0523525
NeuAcHex6HexNAc5dHex2SP	S1H6N5F2P1	2667.88	0	0	0	0	0	0	0	0	0	0	0	0	0	0	0	0	0	0	0	0	0	0	0	0	0	0	0	0	0.337459	0	0	0	0	0	0	0	0	0	0	0	0	0	0	0	0	0.00843646	0
Hex6HexNAc5dHex4SP	H6N5F4P1	2668.9	0	0.683407	0.857273	0	0	0	0	0	0.509716	0	0	0	0	0	0	0	0	0	0	0	3.7546	0	0.788821	0	0	0.689204	0	0	0.96235	0	0	0	0	0	0	0	0	0	0	0	0	0	0	0	0.38517	0.167617	0.227171
NeuAcHex5HexNAc7dHex	S1H5N7F1	2685.98	0	0	0	0	0	0	0	0	0	0	0	0	0	0	0	0	0	0	0	0	0	0	0	0	0	0	0	0	0	0	0	0	0.493364	0	0	0	0	0	0	0	0	0	0	0	0	0.0123341	0
NeuAcHex6HexNAc7	S1H6N7	2701.97	0	0	0	0	0	0	0	0	0	0	0	0	0	0	0	0	0	0	0	0	0	0	0	0	0	0	0	0	0	0	0	1.06258	0	0	0	0	0	0	0	0	0	0	0	0	0	0.0265646	0
Hex5HexNAc6dHex4SP	H5N6F4P1	2709.93	0.414735	1.21703	0.631675	0	0	0	0	0	0	0	0	0	0	0	0	0	0	0	0	0	0.571893	0.779352	0	0	0	0	0	0	0.39278	0	0	0	0	1.80388	0	0	0	0	0	0	0	0	0	0	0.565859	0.0886977	0.0675622
NeuAc3Hex5HexNAc5	S3H5N5	2715.95	0	0	0	0	0	0	0	0	0	0	0	0	0	0	0	0	0	0	0	0	0	0	0	0	0.413503	0	0	0.295461	0	0	0	0	0	0	0	0	0	0	0	0	0	0	0	0	0	0.0177241	0
Hex6HexNAc6dHex3SP	H6N6F3P1	2725.93	0.503607	1.91916	1.80889	0	0	0	0	0	0.936214	0	0	0	0	0	0	0	0	0	0	0	0.882704	0	0.408667	0	0	0.516903	0.909287	0	0.359587	0	0	0	0	0	0	0	0	0	0	0	0	0	0	0	1.05791	0.100334	0.0645685
NeuAc2Hex6HexNAc5dHex	S2H6N5F1	2732.97	1.68856	0.908089	1.16491	0	1.51203	1.32617	1.26827	1.08231	1.88283	1.44842	1.63082	1.36266	1.74508	0.956786	0	2.43254	1.26166	1.16498	3.51876	2.40582	1.10027	1.79993	0.712791	0.757685	1.84197	2.30453	1.62373	1.48825	1.84772	3.6208	2.47661	0.811508	1.48906	2.18871	1.63241	1.32865	0	1.64566	1.12232	1.91693	1.2092	1.33766	0	3.1714	0.94039	1.56067	1.42593
NeuAcHex6HexNAc5dHex3	S1H6N5F3	2733.99	0.567179	0	0	0	1.32225	0	1.33909	0.298508	0.134669	0.49571	0.289501	1.17234	0.0271737	0.633723	0	0.526158	0	0.288225	0.163609	0	0.42732	0	2.58563	0.170516	0	0	0	0.152214	0.782624	1.29632	0	0	0.717027	0.56618	0.800633	0	0	0	0	0	0.919963	0	0	1.51665	0.141795	0.415651	0.369935
Hex7HexNAc6dHex2SP	H7N6F2P1	2741.92	0	0	0	0	0	0	0	0	0.468107	0	0	0	0	0	0	0	0.688177	0	0	0	0	0	0	0	0	0	0	0	0	0	0	0	0	0	0	0	0	0	0	0	0	0	0	0	0	0.0289071	0.0344088
Hex5HexNAc7dHex3SP	H5N7F3P1	2766.95	0	0	0	0	0	0	0	0	0	0	0	0	0	0	0	0	0	0	0	0	0	0	0	0	0	0	0.746914	0	0	0	0	0	0	0.545174	0	0	0	0	0	0	0	0	0	0	0	0.0323022	0
NeuAc2Hex5HexNAc6dHex	S2H5N6F1	2773.99	0	0	0	0	0	0	0	0	0	0	0	0	0	0	0	0	0	0	0	0	0	0	0	0	0	0	0	0	0	0	0	0	0	0.40888	0	0	0	0	0	0	0	0	0	0	0	0.010222	0
NeuAcHex5HexNAc6dHex3	S1H5N6F3	2775.01	0	0	0	0	0	0	0	0	0	0	0	0	0	0	0	0	0	0	0	0	0	0	0	0	0	0	0	0	0.326394	0	0	0	0.807323	0.0924547	0	0	0	0	0	0	0	0	0	0	0	0.0306543	0
Hex6HexNAc7dHex2SP	H6N7F2P1	2782.95	0	0	0	0	0	0	0	0	0	0	0	0	0	0	0	0	0	0	0	0	0	0	0	0	0	0.484597	0.432994	0	0	0	0	0	0	0	0	0	0	0	0	0	0	0	0	0	0	0.0229398	0
NeuAc2Hex6HexNAc6	S2H6N6	2789.99	0	0	0	0	0	0	0	0	0	0	0	0	0	0	0	0	0	0	0	0	0	0	0	0	0	0	0	0	0	0	0	0.833926	0	0	0	0	0	0	0	0	0	0	0	0	0	0.0208481	0
NeuAcHex6HexNAc6dHex2	S1H6N6F2	2791.01	0	0	0	0	0	0	0	0	0	0	0	0	0	0	0	0	0	0	0	0	0	0	0	0	0	0	0	0	0	0	0	1.32262	0.834234	0	0	0	0	0	0	0	0	0	0	0	0	0.0539215	0
NeuAc3Hex5HexNAc4dHex2	S3H5N4F2	2804.99	0	0	0	0	0	0	0	0	0	0	0	0	0	0	0	0	0	0	0	0	0	0	0	0	0	0.430753	0	0	0	0	0	0	0	0	0	0	0	0	0	0	0	0	0	0	0	0.0107688	0
NeuAcHex7HexNAc6dHex	S1H7N6F1	2807	0.68135	0.851918	0.570148	0	0	0	0.766066	0.47351	0.520119	0.576165	0.35744	0.51911	1.26489	0.956786	0	1.38758	0.927996	0.633386	1.31954	1.48794	0.571893	0.723684	0	0.447723	0.958576	0.5432	0.638666	0.563565	0.619596	1.56721	0	0.735289	0.977758	1.29078	0	0	0	1.9055	0	0	1.2092	0	1.34872	0	0.525854	0.632297	0.598157
Hex4HexNAc8dHex3SP	H4N8F3P1	2807.98	0	0	0.605424	0	0	0	0	0	0	0.513886	0.218273	0	0	0	0	0	0	0	0.481114	0	0	0	0	0	0	0.578449	0	0.224285	0	0	0	0	0	0	0	0	0	0	0	0	0	0	0	0	0.151356	0.0504002	0.0240557
NeuAcHex6HexNAc5dHex3SP	S1H6N5F3P1	2813.94	0	0	0	0	0	0	0	0	0	0	0	0	0	0	0	0	0	0	0	0	0.248649	0	0	0	0	0	0	0	0.293202	0	0	0	0	0	0	0	0	0	0	0	0	0	0	0	0	0.0135463	0.0124324
Hex8HexNAc7SP	H8N7P1	2814.94	0	0	0	0	0	0	0	0	0	0	0	0	0	0	3.42644	0	1.82471	0	0	0	0	0	0	0	0	0	0	0	0.3461	0	0	0	0	0.456984	0	0	0	0	0	0	0	0	0	0	0	0.151356	0.262558
NeuAcHex5HexNAc7dHex2	S1H5N7F2	2832.03	0	0	0	0	0	0	0	0	0	0	0	0	0	0	0	0	0	0	0	0	0	0	0	0	0	0	0	0	0	0	0	0	0.493364	0	0	0	0	0	0	0	0	0	0	0	0	0.0123341	0
NeuAcHex6HexNAc7dHex	S1H6N7F1	2848.03	0	0	0	0	0	0	0	0	0	0	0	0	0	0	0	0	0	0	0	0	0	0	0	0	0	0	0	0	0	0	0	0	0.69968	0	0	0	0	0	0	0	0	0	0	0	0	0.017492	0
Hex7HexNAc8SP	H7N8P1	2855.96	0	0	0	0	0	0	0	0	0	0	0	0	0	0	0	0	0	0	0	0	0	0	0	0	0	0	0	0	0	0	0	0.452831	0	1.71569	0	0	0	0	0	0	0	0	0	0	0	0.0542131	0
NeuAcHex7HexNAc7	S1H7N7	2864.02	0	0	0	0	0	0	0	0	0	0	0	0	0	0	0	0	0	0	0	0	0	0	0	0	0	0	0	0	0	0	0	1.7351	0	0	0	0	0	0	0	0	0	0	0	0	0	0.0433776	0
Hex6HexNAc6dHex4SP	H6N6F4P1	2871.98	0	1.13277	1.24284	0	0	0	0	0	0.572131	0	0	0	0	0	0	0	0	0	0	0	1.90216	0.816464	0.63676	0	0	0.592285	0	0	0.464697	0	0	0	0	0	0	0	0	0	0	0	0	0	0	0	0.593903	0.124613	0.167769
NeuAc3Hex6HexNAc5	S3H6N5	2878	0.725786	0.636598	0	0	1.14596	1.29096	0.953327	1.3123	0.863397	0.496142	0.949449	0.502888	1.08921	0.912627	2.64208	1.33619	0	1.52691	1.09203	1.57489	0.602974	1.16903	1.52062	0.585484	0.902189	1.28149	0.865988	0.738653	1.01791	2.34181	3.00388	0.860827	0.645858	0	1.23838	0	0	0	0	0	0	0.879032	0	0	0.340596	0.883562	0.708381
NeuAc2Hex6HexNAc5dHex2	S2H6N5F2	2879.02	0.404286	0	1.07467	0	0.625992	0.885805	0	0.93144	0	0.17544	0.144763	0.664492	0	0.484631	0	0.510064	0	0.373192	0.945376	0.673774	0	1.89271	0	0	0	0	0.544018	0.361093	0.433108	0.293478	0.131861	1.08948	0	1.08233	1.02985	0	0	0	0	0	0	0	0	0	0.369739	0.331823	0.271248
NeuAcHex6HexNAc5dHex4	S1H6N5F4	2880.04	0.145623	0	0	0	0	0	0	0	0	0	0	0	0	0.520187	0	0	0	0	0	0	0	0	0.236268	0	0	0	0	0	0	0.229654	0	0	0	0	0	0	0	0	0	0	0	0	0	0	0.0364058	0.0246527	0.0118134
Hex7HexNAc6dHex3SP	H7N6F3P1	2887.98	0	0.393193	0	0	0	0	0	0	0.561728	0	0	0	0	0	0	0.702354	0	0	0	0	0.540812	0	0	0	0	0	0	0	0	0	0	0	0	0	0	0	0	0	0	0	0	0	0	0	0.0982983	0.0451223	0.0621583
NeuAc2Hex5HexNAc6dHex2	S2H5N6F2	2920.05	0	0	0	0	0	0	0	0	0	0	0	0	0	0	0	0	0	0	0	0	0	0	0	0	0	0	0	0	0	0	0	0	0.511305	0	0	0	0	0	0	0	0	0	0	0	0	0.0127826	0
NeuGc3Hex6HexNAc5	G3H6N5	2925.99	0	0	0	0	0	0	0	0	0	0	0	0	0	0	0	0	0	0	0	0	0	0	0	0	0	0	0	0	0	0	0	0.33626	0	0	0	0	0	0	0	0	0	0	0	0	0	0.00840651	0
Hex6HexNAc7dHex3SP	H6N7F3P1	2929.01	0	0	0.328143	0	0	0	0	0	0	0	0	0	0	0	0	0	0	0	0	0	0	0	0	0	0	0	0	0	0	0	0	0	0	0	0	0	0	0	0	0	0	0	0	0	0.0820357	0	0
NeuAcHex6HexNAc6dHex3	S1H6N6F3	2937.07	0	0	0	0	0	0	0	0	0	0	0	0.437999	0	0	0	0	0	0	0	0	0	0	0	0	0	0	0	0	0.354055	0	0	0	0.663799	0.416897	0	0	0	0	0	0	0	0	0	0	0	0.0468188	0
Hex7HexNAc7dHex2SP	H7N7F2P1	2945	0	0.43064	0	0	0	0	0	0	0	0	0	0	0	0	0	0	0	0	0	0	0	0	0	0	0	0	0	0	0	0	0	0	0	0	0	0	0	0	0	0	0	0	0	0	0.10766	0	0
NeuAc2Hex7HexNAc6	S2H7N6	2952.04	0	0	0	0	0	0	0.255355	0	0	0	0	0	0	0	0	0	0	0	0	0	0.23	0	0	0	0	0	0	0.339233	0	0	0	0	0	0	0	0	0	0	0	0	0	0	0	0	0	0.0206147	0.0115
NeuAcHex7HexNAc6dHex2	S1H7N6F2	2953.06	0	0	0	0	0	0	0	0	0	0	0	0	0	0.412154	0	0	0	0	0	0.937206	0	0	0	0	0	0.484597	0	0	0.271073	0	0	0	0	0	0	0	0	0	0	0	0	0	0	0	0	0.0526258	0.0468603
NeuAcHex6HexNAc5dHex4SP	S1H6N5F4P1	2960	0	0	0	0	0	0	0	0	0	0	0	0	0	0	0	0	0	0	0	0	0	0	0	0	0	0	0	0	0.514486	0	0	0	0	0	0	0	0	0	0	0	0	0	0	0	0	0.0128621	0
Hex8HexNAc7dHexSP	H8N7F1P1	2961	0	0	0	0	0	0	0	0	0	0	0	0	0	0	0	0	0	0	0	0	0	0	0	0	0	0	0	0	0.0201694	0	0	0	0	0.641381	0	0	0	0	0	0	0	0	0	0	0	0.0165388	0
NeuAcHex6HexNAc7dHex2	S1H6N7F2	2994.09	0	0	0	0	0	0	0	0	0	0	0	0	0	0	0	0	0	0	0	0	0	0	0	0	0	0	0	0	0	0	0	0	0.636888	0	0	0	0	0	0	0	0	0	0	0	0	0.0159222	0
Hex8HexNAc8SP	H8N8P1	3018.02	0	0	0	0	0	0	0	0	0	0	0	0	0	0	2.10541	0	2.34606	0	0	0	0.317027	0.64946	0	0	0	0	0	0	0	0	0	0.901178	0	0	0	0	0	0	0	0	0	0	0	0	0	0.157978	0.270897
NeuAc3Hex6HexNAc5dHex	S3H6N5F1	3024.06	1.1109	0.627237	0.877782	0	2.40333	1.0093	0.68946	0.730558	1.38352	1.08831	1.32923	1.18422	0.936954	1.32478	1.81643	1.04497	0.729884	1.33464	0	2.03866	0.671352	1.52159	1.03592	0.941367	1.41907	1.10919	0.985061	1.18184	1.14515	2.95428	3.11573	0.717356	1.21995	1.0663	2.47675	0	0	1.38582	0	0	1.45103	0	0	0	0.653979	1.08605	0.822421
NeuAc2Hex6HexNAc5dHex3	S2H6N5F3	3025.08	0.510795	0	0.09045	0	0	0.890643	0.336423	1.18174	0	0	0.336254	0	0	0.302968	0.355774	1.71306	0	0.932324	0	0.956839	0.203263	0	0.535752	1.38909	0	0.122044	0.121839	0.691585	0.173373	0.259302	0	0	0	0	0	0	0	0	0	0	0	0	0	0	0.150311	0.262557	0.304305
NeuAcHex8HexNAc7	S1H8N7	3026.08	0	0	0	0	0	0	0	0	0	0	0.31661	0	0	0	0	0	0.560677	0	0	0	0	0	0.368321	0	0	0	0	0	0.396306	0	0.159907	0	0.356375	0	0	0	0	0	0	0	0	0	0	0	0	0.0539549	0.0464499
Hex7HexNAc6dHex4SP	H7N6F4P1	3034.04	0	0.43064	0	0	0	0	0	0	0	0	0	0	0	0	0	0	0	0	0	0	2.65433	0	0.427674	0	0	0	0.638666	0	0.348523	0	0	0	0	0	0	0	0	0	0	0	0	0	0	0	0.10766	0.10173	0.1541
Hex6HexNAc7dHex4SP	H6N7F4P1	3075.06	0	0	0	0	0	0.340344	0	0	0	0	0	0	0	0	0	0	0	0	0	0	0	0	0	0	0	0	1.6129	0	0	0	0	0	0	0.67345	0	0	0	0	0	0	0	0	0	0	0	0.0656674	0
NeuAc2Hex6HexNAc6dHex2	S2H6N6F2	3082.1	0	0	0	0	0	0	0	0	0	0	0	0	0	0	0	0	0	0	0	0	0	0	0	0	0	0	0	0	0	0	0	0.730806	0	0	0	0	0	0	0	0	0	0	0	0	0	0.0182701	0
NeuAcHex6HexNAc6dHex4	S1H6N6F4	3083.12	0	0	0	0	0	0	0	0	0	0	0	0	0	0	0	0	0	0	0	0	0	0	0	0	0	0	0	0	0	0	0	0	0.556156	0	0	0	0	0	0	0	0	0	0	0	0	0.0139039	0
Hex7HexNAc7dHex3SP	H7N7F3P1	3091.06	0.414735	0	0	0	0	0	0	0	0	0	0	0	0	0	0	0	0	0	0	0	0	0	0	0	0	0.646129	0.833513	0	0	0	0	0	0	0	0	0	0	0	0	0	0	0	0	0	0.103684	0.0369911	0
NeuAc2Hex7HexNAc6dHex	S2H7N6F1	3098.1	0.518419	0.514896	0.430688	0	0.668476	0.399024	0.306426	0	0	0.432124	0.54733	0.648888	0.374782	0.588792	0	0.702354	0	0	0	0	0.27973	0.64946	0	0.424763	0.55447	0.54921	0.487118	0.514321	0.520018	1.9455	0	0	0	0.617329	0	0	0	0	0	0	0	0	0	0	0.366	0.280253	0.102815
NeuAcHex7HexNAc6dHex3	S1H7N6F3	3099.12	0	0	0	0	0	0	0.493794	0.798202	0	0	0	0	0.298134	0	0	0.568885	0.729884	0	0	1.2947	0.309355	0	1.13096	0	0.880715	0.986436	0.27891	0.0497271	0	0.234861	0	0	0	0.595052	0	0	0	0	0	0	0	0	0	0	0	0.21624	0.201689
NeuAcHex6HexNAc7dHex3	S1H6N7F3	3140.14	0	0	0	0	0	0	0	0	0	0	0	0	0	0	0	0	0	0	0	0	0	0	0	0	0	0	0	0	0	0	0	0	0.565126	0	0	0	0	0	0	0	0	0	0	0	0	0.0141282	0
NeuAcHex7HexNAc7dHex2	S1H7N7F2	3156.14	0	0	0	0	0	0	0	0	0	0	0	0	0	0	0	0	0	0	0	0	0	0	0	0	0	0	0	0	0	0	0	0	0.430572	0	0	0	0	0	0	0	0	0	0	0	0	0.0107643	0
NeuAc2Hex6HexNAc5dHex4	S2H6N5F4	3171.14	0	0	0	0	0	0	0	0	0	0	0	0	0	0	0	0	0	0	0	0	0	0	0	0	0	0	0	0	0.342991	0	0	0	0	0	0	0	0	0	0	0	0	0	0	0	0	0.00857477	0
NeuAcHex8HexNAc7dHex	S1H8N7F1	3172.13	0.429547	0.533619	0	0	0	0	0	0	0	0	0.36861	0	0	0.618231	0	1.28479	0	0.361935	0	0	0.292163	0	0.475194	0.585484	0.498083	0	0.541242	0.191503	0.105565	0	0	0	0	0.737588	0	0	0	0	0	0	0	0	0	0	0.240791	0.15151	0.149978
Hex9HexNAc8SP	H9N8P1	3180.07	0	0	0	0	0	0	0	0	0	0	0	0	0	0	0	0	0.740311	0	0	0	4.12757	0.909244	0.598744	0	0	1.36764	0.606191	0	0.713642	0	0	0	0	0	0	0	0	0	0	0	0	0	0	0	0	0.226584	0.318794
Hex8HexNAc9SP	H8N9P1	3221.1	0	0.37447	0	0	0	0	0	0	0	0	0	0	0	0	0	0	0	0	0	0	0	0	0	0	0	0	0.638666	0	0	0	0	0	0	0	0	0	0	0	0	0	0	0	0	0	0.0936174	0.0159666	0
NeuAc2Hex6HexNAc6dHex3	S2H6N6F3	3228.16	0	0	0	0	0	0	0	0	0	0	0	0	0	0	0	0	0	0	0	0	0	0	0	0	0	0	0	0	0	0	0	0	0.493364	0	0	0	0	0	0	0	0	0	0	0	0	0.0123341	0
NeuAcHex8HexNAc8	S1H8N8	3229.16	0	0	0	0	0	0	0	0	0	0	0	0	0	0	0	0	0	0	0	0	0	0	0	0	0	0	0	0	0	0	0	0.264525	0	0	0	0	0	0	0	0	0	0	0	0	0	0.00661312	0
Hex7HexNAc7dHex4SP	H7N7F4P1	3237.12	0	0.617875	0	0	0	0	0	0	0	0	0	0	0	0	0	0	0	0	0	0	0	0	0	0	0	0	0.876813	0	0	0	0	0	0	0	0	0	0	0	0	0	0	0	0	0	0.154469	0.0219203	0
NeuAc2Hex7HexNAc6dHex2	S2H7N6F2	3244.16	0	0	0	0	0	0	0	0	0	0	0	0	0	0	0	0	0	0	0	0.473434	0	0	0	0	0.413503	0	0	0	0	0	0	0	0	0	0	0	0	0	0	0	0	0	0	0	0	0.0221734	0.0236717
NeuAcHex7HexNAc6dHex4	S1H7N6F4	3245.18	0	0	0	0	0	0	0.366009	0	0	0	0	0	0	0	0	0	0	0	0	0	0	0	1.06443	0	0.133012	0	0	0	0	0	0	0	0	0	0	0	0	0	0	0	0	0	0	0	0	0.0390864	0.0532217
NeuAc2Hex6HexNAc7dHex2	S2H6N7F2	3285.18	0	0	0	0	0.493399	0	0	0	0	0	0	0	0	0	0	0	0	0	0	0	0	0	0	0	0	0	0	0	0	0	0	0	0	0	0	0	0	0	0	0	0	0	0	0	0	0.012335	0
NeuAc3Hex5HexNAc8	S3H5N8	3325.19	0	0	0	0	0	0	0	0	0	0	0	0	0	0	0	0	0	0	0	0	0.578109	0	0	0	0	0	0	0	0	0	0	0	0	0	0	0	0	0	0	0	0	0	0	0	0	0.0144527	0.0289054
Hex9HexNAc8dHexSP	H9N8F1P1	3326.13	0	0	0	0	0	0	0	0	0	0	0	0	0	0	0	0	0	0	0	0	0	1.59582	0	0	0	0	0	0	0	0	0	0	0	0	0	0	0	0	0	0	0	0	0	0	0	0.0398954	0.0797908
Hex8HexNAc9dHexSP	H8N9F1P1	3367.15	0	0	0	0	0	0	0	0	0	0	0	0	0	0	0	0	0	0	0	0	0	0	0	0	0	0	0	0	0	0	0	0	0	1.17854	0	0	0	0	0	0	0	0	0	0	0	0.0294634	0
Hex9HexNAc9SP	H9N9P1	3383.15	0	0.580428	0	0	0	0	0	0	0	0	0	0	0	0	0	0	0	0	0	0	0.254865	0	0	0	0	0	0.627841	0	0	0	0	0	0	0	0	0	0	0	0	0	0	0	0	0	0.145107	0.0220677	0.0127433
NeuAc3Hex7HexNAc6dHex	S3H7N6F1	3389.19	0	0	0	0	0	0	0	0	0	0.240069	0	0	0	0	0	0	0	0	0	0	0.254865	0	0	0	0	0	0	0	0.226816	0	0	0	0	0.360777	0	0	0	0	0	0	0	0	0	0	0	0.0270632	0.0127433
NeuAc2Hex7HexNAc6dHex3	S2H7N6F3	3390.21	0	0	0	0	0	0	0	0	0	0	0.43563	0	0	0	0	0	0	0	0	0.714982	0	0	0.399163	0	0	0	0	0	0	1.38707	0	0	0	0	0	0	0	0	0	0	0	0	0	0	0	0.0734212	0.0557072
NeuAcHex9HexNAc8	S1H9N8	3391.21	0	0	0	0	0	0	0	0	0	0	0	0	0	0	0	0	0	0	0	0	0	0	0	0	0	0	0	0.284518	0	0	0	0	0	0	0	0	0	0	0	0	0	0	0	0	0	0.00711295	0
NeuAc2Hex8HexNAc7dHex	S2H8N7F1	3463.23	0	0	0	0	0	0	0	0	0	0	0	0	0	0	0	0	0	0	0	0	0	0	0	0	0	0	0	0.224332	0	0	0	0	0	0	0	0	0	0	0	0	0	0	0	0	0	0.00560829	0
NeuAcHex8HexNAc7dHex3	S1H8N7F3	3464.25	0	0	0	0	0	0	0	0	0	0	0.27925	0	0.456765	0	0	0	0	0	0	0	0	0	0	0	0	0	0	0	0	0	0	0	0	0	0	0	0	0	0	0	0	0	0	0	0	0.0184004	0
NeuAc2Hex5HexNAc8dHex3	S2H5N8F3	3472.27	0	0	0	0	0	0	0	0	0	0	0	0	0	0	0	0	0	0	0	0	0	1.00202	0	0	0	0	0	0	0	0	0	0	0	0	0	0	0	0	0	0	0	0	0	0	0	0.0250506	0.0501012
NeuAc2Hex5HexNAc9dHex2	S2H5N9F2	3529.29	0	0	0	0	0	0	0	0	0	0	0	0	0	0	0	0.702354	0	0	0	0	0	1.15047	0	0	0	0	0	0	0	0	0	0	0	0.448966	0	0	0	0	0	0	0	0	0	0	0	0.0575448	0.0926413
NeuAcHex9HexNAc8dHex	S1H9N8F1	3537.27	0	0	0	0	0	0	0	0	0	0	0	0	0	0.67711	0	0	0	0	0	0	0	0	0	0	0	0	0	0	0	0	0	0	0	0.336725	0	0	0	0	0	0	0	0	0	0	0	0.0253459	0
Hex10HexNAc9SP	H10N9P1	3545.2	0	0	0	0	0	0	0	0	0	0	0	0	0	0	0	0	0	0	0	0	0.298379	0	0	0	0	0	0	0	0	0	0	0	0	0	0	0	0	0	0	0	0	0	0	0	0	0.00745947	0.0149189
Hex8HexNAc8dHex4SP	H8N8F4P1	3602.25	0	0.37447	0	0	0	0	0	0	0	0	0	0	0	0	0	0	0	0	0	0	0	0	0	0	0	0	0	0	0	0	0	0	0	0	0	0	0	0	0	0	0	0	0	0	0.0936174	0	0
Hex9HexNAc8dHex3SP	H9N8F3P1	3618.24	0	0	0	0	0	0	0	0	0	0	0	0	0	0	0	0	0	0	0	0	0	0	0	0	0	0	0	0	0	0	0	0	0	0.529139	0	0	0	0	0	0	0	0	0	0	0	0.0132285	0
NeuAc3Hex7HexNAc6dHex3	S3H7N6F3	3681.31	0	0	0	0	0	0	0	0	0	0	0	0	0	0	0	0	0	0	0	0	0	0	0	0	0.272536	0	0	0	0	0	0	0	0	0	0	0	0	0	0	0	0	0	0	0	0	0.00681341	0
NeuAcHex9HexNAc8dHex2	S1H9N8F2	3683.32	0	0	0	0	0	0	0	0	0	0	0	0	0	0	0	0	0	0	0	0	0	0	0	0	0.215594	0	0	0	0	0	0	0	0	0	0	0	0	0	0	0	0	0	0	0	0	0.00538986	0
Hex10HexNAc9dHexSP	H10N9F1P1	3691.26	0	0	0	0	0	0	0	0	0	0	0	0	0	0	0	0	0	0	0	0	0.211352	0	0	0	0	0	0	0	0	0	0	0	0	0	0	0	0	0	0	0	0	0	0	0	0	0.00528379	0.0105676
[truncated: 13 more columns]

## Sheet: Acidic-Sugar class table
Acidic N-glycan structural features		AH33-31-11-2b	AH34-1-11-2	AH34-6-11-2	AH34-14-11-2	AH33-31-1-2b	AH33-31-2-2b	AH33-31-3-2b	AH33-31-4-2b	AH33-31-5-2b	AH33-31-6-2b	AH33-31-7-2b	AH33-31-8-2b	AH33-31-9-2b	AH33-31-10-2b	AH34-1-1-2	AH34-1-2-2	AH34-1-3-2	AH34-1-4-2	AH34-1-5-2	AH34-1-6-2	AH34-1-7-2	AH34-1-8-2	AH34-1-9-2	AH34-1-10-2	AH34-6-1-2	AH34-6-2-2	AH34-6-3-2	AH34-6-4-2	AH34-6-5-2	AH34-6-6-2	AH34-6-7-2	AH34-6-8-2	AH34-6-9-2	AH34-6-10-2	AH34-14-1-2	AH34-14-2-2	AH34-14-3-2	AH34-14-4-2	AH34-14-5-2	AH34-14-6-2	AH34-14-7-2	AH34-14-8-2	AH34-14-9-2	AH34-14-10-2
		Normal colon				MSI CRC Stage IV BRAFwt										MSI CRC Stage II BRAFwt										MSI CRC Stage IV BRAFmut										MSI CRC Stage II BRAFmut										AVERAGES
		A	B	C	D	500	501	502	503	504	505	506	507	508	509	600	601	602	603	604	605	606	607	608	609	700	701	702	703	704	705	706	707	708	709	800	801	802	803	804	805	806	807	808	809	Normal	MSI CRC	MSI CRC St II	MSI CRC St IV
Short	Class name	%	%	%	%	%	%	%	%	%	%	%	%	%	%	%	%	%	%	%	%	%	%	%	%	%	%	%	%	%	%	%	%	%	%	%	%	%	%	%	%	%	%	%	%	%	%	%	%
N3	3 HexNAc	0.79985	0	0.87778	0	3.54929	0	1.63427	1.78581	0	3.33696	2.27868	1.80066	1.95589	5.358	0	2.48393	4.01436	0	0	3.5266	3.51838	1.98549	2.85116	0.58548	1.34389	1.0015	1.84022	3.23913	1.88092	2.23373	0	0.86979	1.71332	1.79587	0	1.20409	1.9765	1.86219	1.20546	0	7.88395	0	1.34872	0	0.419407	1.80161	1.72232	1.8809
N4	4 HexNAc	82.6418	68.5071	67.6546	97.6715	83.8546	89.3975	84.033	86.6011	80.725	86.4049	86.0948	86.1263	86.7564	82.0356	60.2195	73.9459	55.3135	87.2315	83.8647	78.2919	65.4748	75.9808	76.0403	89.7155	84.6458	78.8167	73.7134	80.3706	74.512	73.9436	65.0517	36.4365	66.3791	63.1224	92.822	96.2216	89.6111	91.1221	94.0143	98.0831	84.6664	96.4457	93.2564	95.3119	79.1188	80.6664	83.8816	77.4511
N5	5 HexNAc	13.0035	19.5099	22.5333	2.3285	11.4342	9.86315	12.1451	10.3414	12.0246	8.4959	9.10333	10.467	8.8931	9.35329	14.5569	17.8585	13.5237	11.7732	14.3347	13.2732	15.3817	13.7578	15.1805	8.24101	9.75492	12.5923	10.474	13.4735	16.8831	18.688	23.0285	23.6968	19.7104	16.7931	7.17802	2.57426	7.1304	5.1102	4.78026	1.91693	6.24042	3.55435	4.04615	4.68805	14.3438	11.3079	9.25501	13.3608
N6	6 HexNAc	2.71059	9.07153	7.76468	0	0.66848	0.39902	2.18765	1.27171	7.25046	1.24836	1.3404	1.606	1.9378	1.95773	11.0224	3.36117	14.8836	0.63339	1.31954	4.90825	9.42234	2.96896	4.06766	0.87249	3.54174	4.5126	6.1135	1.99211	4.97336	5.13465	9.15545	22.7772	8.52174	9.83043	0	0	1.28205	1.9055	0	0	1.2092	0	1.34872	0	4.8867	3.89064	2.96026	4.82102
N7+	7 HexNAc or larger	0.84428	2.9115	1.16962	0	0.4934	0.34034	0	0	0	0.51389	1.18274	0	0.45677	1.29534	14.2012	2.35049	12.2648	0.36193	0.48111	0	6.20284	5.30701	1.44226	0.58548	0.71368	3.07681	7.85884	0.92464	1.75061	0	2.76434	16.2197	3.67537	8.45821	0	0	0	0	0	0	0	0	0	0	1.23135	2.32304	2.15986	2.48623
F	Fucosylation	67.1915	76.1744	72.7039	71.5706	61.2125	48.5259	69.6212	58.6423	73.4531	52.8425	57.014	76.0398	61.7371	62.0377	27.9208	72.454	41.8158	54.5998	62.416	51.932	68.6578	67.861	59.2782	55.8132	60.8874	59.4123	64.1698	52.4242	74.4738	63.0895	38.596	36.5891	74.2847	73.9611	24.853	62.2165	63.5684	45.3035	70.0714	44.693	44.764	60.4436	71.4072	65.933	71.9101	58.3754	55.8001	60.9507
E	Complex fucosylation	13.8833	24.4976	24.1299	4.85623	14.1646	6.56971	10.2511	10.6419	19.5168	6.94133	7.10651	7.1928	3.4	12.0345	5.29805	14.2064	4.84742	6.46243	6.08543	12.1501	26.0652	20.2649	23.4296	7.03429	10.1862	10.8618	19.6796	4.77836	19.5496	8.92158	7.37483	8.21325	22.311	23.5373	1.83048	11.0634	28.2051	12.6068	5.76656	6.56733	5.15074	5.48495	3.0542	13.5538	16.8417	11.309	10.9564	11.6616
S	Sialylated	94.4603	77.0076	79.0622	100	100	99.1902	100	100	83.2314	99.4861	99.7817	100	100	100	59.9973	94.9807	68.5786	100	98.8515	100	76.1359	90.2395	91.7411	100	100	93.3264	85.7112	99.7757	90.5916	98.9732	75.905	71.6375	100	81.7126	100	100	100	100	100	100	100	100	100	100	87.6325	93.9962	94.0262	93.9661
P	Sulfate or phosphate	5.53967	22.9924	20.9378	0	0	0.80978	0	0	16.7686	0.51389	0.21827	0	0	0	40.0027	5.67022	31.4215	0	1.14847	0	24.1127	9.76045	8.25887	0	0	6.6736	14.2888	0.22428	11.2672	1.02679	24.095	29.461	1.38142	18.7844	0	0	0	0	0	0	0	0	0	0	12.3675	6.1472	6.01874	6.27565
A	Acetylated	0	0	0.42314	0	0	0	0	0	0	0	0	0	0	0	0	0	0	0	0	0	0	0	0	0	0	0	0	0	0	0	0	0	0	0	0	0	0	0	0	0	0	0	0	0	0.105785	0	0	0
nH	Hybrid-type	0.79985	0	0.87778	0	3.54929	0	1.63427	1.78581	0	3.33696	2.27868	1.80066	1.95589	5.358	0	2.48393	4.01436	0	0	3.5266	3.51838	1.98549	2.85116	0.58548	1.34389	1.0015	1.84022	3.23913	1.88092	2.23373	0	0.86979	1.71332	1.79587	0	1.20409	1.9765	1.86219	1.20546	0	7.88395	0	1.34872	0	0.419407	1.80161	1.72232	1.8809
nC	Complex-type	99.2001	100	99.1222	100	96.4507	100	98.3657	98.2142	100	96.663	97.7213	98.1993	98.0441	94.642	100	97.5161	95.9856	100	100	96.4734	96.4816	98.0145	96.7307	99.4145	98.6561	98.9985	98.1598	96.7609	98.1191	97.7663	100	99.1302	98.2867	98.2041	100	98.7959	98.0235	98.1378	98.7945	100	92.1161	100	98.6513	100	99.5806	98.1879	98.2568	98.1191
nR	Large-N-glycans	15.0942	25.1363	23.5853	2.3285	12.5481	9.29983	14.2334	11.8242	17.1217	9.81573	11.6742	11.6667	11.5129	13.3201	38.0879	22.4804	34.1719	12.203	15.6542	18.8461	28.537	18.7694	21.3897	9.28265	14.2012	18.5289	17.4168	14.9757	21.0459	23.6484	29.6595	47.7912	21.8586	21.6411	7.17802	2.60564	1.3079	7.14883	4.83859	1.91693	8.08721	3.55435	5.46863	4.68805	16.5361	15.5	13.3108	17.6892
nB	Biantennary-size	82.5019	67.4867	66.333	97.6715	85.6697	89.0571	84.7888	87.3631	80.132	87.0201	87.0851	86.8135	87.2329	85.1246	60.2195	75.8295	56.7904	87.2315	83.8647	80.5191	66.7542	77.5199	77.0383	89.3663	85.114	79.6141	74.7314	81.981	75.3484	74.6196	65.0517	36.129	65.0903	61.7553	92.822	96.3017	91.4179	92.8512	93.9412	98.0831	91.9128	96.4457	94.5314	95.3119	78.4982	81.4619	84.9376	77.9861
nCS	Sialylated complex Nglycan	94.4157	77.0076	78.8768	100	100	99.1902	100	100	83.2314	99.4684	99.7766	100	100	100	59.9973	96.0474	69.2524	100	98.8515	100	75.2657	90.0418	91.8943	100	100	93.2589	86.8108	99.7682	91.1103	98.9497	75.905	71.3886	100	81.3782	100	100	100	100	100	100	100	100	100	100	87.575	94.0397	94.0675	94.0118
nN	Monoantennary	100	0	63.0841	0	100	0	100	100	0	100	100	100	100	100	0	53.1035	37.4026	0	0	100	100	100	100	100	100	100	27.0588	100	63.5294	100	0	58.2474	100	100	0	100	100	100	100	0	100	0	100	0	40.771	68.4835	59.5253	77.4418
nG	Glucosylated	0	0	0	0	0	0	0	0	0	0	0	0	0	0	0	0	0	0	0	0	0	0	100	0	0	0	0	0	0	0	0	0	0	0	0	0	0	0	0	0	0	0	0	0	0	2.5	5	0
nF	Fucosylation	67.1915	76.1744	72.7039	71.5706	61.2125	48.5259	69.6212	58.6423	73.4531	52.8425	57.014	76.0398	61.7371	62.0377	27.9208	72.454	41.8158	54.5998	62.416	51.932	68.6578	67.861	59.2782	55.8132	60.8874	59.4123	64.1698	52.4242	74.4738	63.0895	38.596	36.5891	74.2847	73.9611	24.853	62.2165	63.5684	45.3035	70.0714	44.693	44.764	60.4436	71.4072	65.933	71.9101	58.3754	55.8001	60.9507
nFH	Fucosylation in hybrid-type	100	0	63.0841	0	87.8924	0	100	100	0	91.3669	100	100	100	100	0	100	37.1429	0	0	100	100	100	100	100	100	100	100	38.3446	100	100	0	26.2887	100	84.375	0	100	100	100	100	0	100	0	100	0	40.771	69.1353	61.8571	76.4134
nFC	Fucosylation in complex-type	66.927	76.1744	72.7891	71.5706	60.2307	48.5259	69.1165	57.8903	73.4531	51.5126	56.0117	75.6005	60.9738	59.8885	27.9208	71.7524	42.0112	54.5998	62.416	50.1748	67.5148	67.21	58.3342	55.5529	60.3546	59.0017	63.498	52.8955	73.9844	62.2461	38.596	36.6795	73.8364	73.7707	24.853	61.756	62.8338	44.2656	69.7062	44.693	40.0365	60.4436	71.0163	65.933	71.8653	57.7773	55.1512	60.4033
nE	Complex fucosylation	13.8833	24.4976	24.1299	4.85623	14.1646	6.56971	10.2511	10.6419	19.5168	6.94133	7.10651	7.1928	3.4	12.0345	5.29805	14.2064	4.84742	6.46243	6.08543	12.1501	26.0652	20.2649	23.4296	7.03429	10.1862	10.8618	19.6796	4.77836	19.5496	8.92158	7.37483	8.21325	22.311	23.5373	1.83048	11.0634	28.2051	12.6068	5.76656	6.56733	5.15074	5.48495	3.0542	13.5538	16.8417	11.309	10.9564	11.6616
nEH	Complex fucosylation in hybrid-type	0	0	0	0	0	0	0	0	0	0	0	0	0	0	0	0	15.0649	0	0	0	0	0	0	0	0	0	52.3529	0	59.4118	0	0	0	28.7958	0	0	0	0	0	0	0	0	0	0	0	0	3.89064	0.753247	7.02803
nEC	Complex fucosylation in complex-type	13.9952	24.4976	24.3436	4.85623	14.6858	6.56971	10.4214	10.8354	19.5168	7.18095	7.27222	7.3247	3.46783	12.7158	5.29805	14.5683	4.4201	6.46243	6.08543	12.5943	27.0157	20.6754	24.2215	7.07572	10.325	10.9716	19.0671	4.93832	18.7855	9.12541	7.37483	8.28532	22.198	23.9677	1.83048	11.1982	28.7738	12.846	5.83692	6.56733	5.59158	5.48495	3.09595	13.5538	16.9231	11.4556	11.1598	11.7515
nT	Terminal HexNAc	1.58488	6.35662	8.08934	0	0.4934	1.3027	0.33196	0	2.15329	0.76996	0.21827	0.61644	0	0	1.69258	1.64813	7.87201	0.56552	0.48111	0	3.47391	3.63697	0	0.47068	0	1.8384	7.35007	1.89966	2.95701	0.70254	5.28875	15.3181	11.8049	14.2141	0	0	7.1304	0	0	0	0	0	0	0	4.00771	2.35577	1.34857	3.36298
nTC	Terminal HexNAc in complex-type	1.59766	6.35662	8.16097	0	0.51156	1.3027	0.33748	0	2.15329	0.79654	0.22336	0.62775	0	0	1.69258	1.69011	8.20124	0.56552	0.48111	0	3.6006	3.71065	0	0.47346	0	1.857	7.48786	1.96325	3.01369	0.71859	5.28875	15.4525	12.0106	14.474	0	0	7.27417	0	0	0	0	0	0	0	4.02881	2.39771	1.38447	3.41095
nQ	Terminal HexNAc (bisecting-size)	4.3301	14.4545	13.3371	0	1.55117	1.31443	2.78635	0.66119	5.73171	1.07621	1.36022	2.49447	0.5495	0.731	20.311	3.37285	12.5685	0.96139	1.12236	1.05159	5.92103	3.57813	3.70406	0.60048	1.67654	3.13279	5.30436	3.50501	3.28923	2.83753	6.08766	37.3691	10.3187	5.33917	0	0	0	2.11817	1.34639	0	0	0	0	0	8.03044	3.8443	2.8328	4.85581
nX	Terminal Hex in complex-type	0	0	0.42688	0	0	0	0	0	0	0	0	0	0	0	0	0	0	0	0	0	0	0	0	0	0	0	0	0	0	0	0	0	0	0	0	0	0	0	0	0	0	0	0	0	0.10672	0	0	0
nS	Sialylation	94.4603	77.0076	79.0622	100	100	99.1902	100	100	83.2314	99.4861	99.7817	100	100	100	59.9973	94.9807	68.5786	100	98.8515	100	76.1359	90.2395	91.7411	100	100	93.3264	85.7112	99.7757	90.5916	98.9732	75.905	71.6375	100	81.7126	100	100	100	100	100	100	100	100	100	100	87.6325	93.9962	94.0262	93.9661
nP	Sulfate/phosphate	5.53967	22.9924	20.9378	0	0	0.80978	0	0	16.7686	0.51389	0.21827	0	0	0	40.0027	5.67022	31.4215	0	1.14847	0	24.1127	9.76045	8.25887	0	0	6.6736	14.2888	0.22428	11.2672	1.02679	24.095	29.461	1.38142	18.7844	0	0	0	0	0	0	0	0	0	0	12.3675	6.1472	6.01874	6.27565
nPM	Sulfate/phosphate in mannose type	0	0	0	0	0	0	0	0	0	0	0	0	0	0	0	0	0	0	0	0	0	0	100	0	0	0	0	0	0	0	0	0	0	0	0	0	0	0	0	0	0	0	0	0	0	2.5	5	0
nPH	Sulfate/phosphate in hybrid type	0	0	0	0	0	0	0	0	0	0	0	0	0	0	0	46.8965	47.5325	0	0	0	0	0	0	0	0	0	72.9412	0	36.4706	0	0	0	0	0	0	0	0	0	0	0	0	0	0	0	0	5.09602	4.72145	5.47059
nPC	Sulfate/phosphate in complex-type	5.58434	22.9924	21.1232	0	0	0.80978	0	0	16.7686	0.53163	0.22336	0	0	0	40.0027	4.6201	30.7477	0	1.14847	0	24.992	9.95817	8.1057	0	0	6.74111	13.1892	0.23179	10.7841	1.05025	24.095	29.7195	1.4055	19.1279	0	0	0	0	0	0	0	0	0	0	12.425	6.10631	5.97874	6.23389
nA	Acetylation	0	0	0.42314	0	0	0	0	0	0	0	0	0	0	0	0	0	0	0	0	0	0	0	0	0	0	0	0	0	0	0	0	0	0	0	0	0	0	0	0	0	0	0	0	0	0.105785	0	0	0
[truncated: 12 more columns]
